# Supplementary material
Source: PubMed Central journal article supplement (PMC11075780)
Supplement: NIHMS1965190-supplement-Supplemental_Material.pdf [file NIHMS1965190-supplement-Supplemental_Material.pdf]

**Title:** Longitudinal assessment of brain structure and behavior in youth with rapid weight gain: Potential contributing causes and consequences

Shana Adise, PhD<sup>1</sup>, Andrew T. Marshall, PhD<sup>2</sup>, Sage Hahn, BS<sup>3</sup>, Shaomin Zhao, PhD<sup>2</sup>, Eric Kan, BS<sup>1</sup>, Kyung E. Rhee, MD, MSc, MA<sup>4</sup>, Megan M. Herting, PhD<sup>5</sup>, and Elizabeth R. Sowell, PhD<sup>2</sup>.

<sup>1</sup>Children's Hospital of Los Angeles, Department of Pediatrics, Division of Pediatric Research Administration

<sup>2</sup>Children's Hospital of Los Angeles, Department of Pediatrics, Division of Neurology

<sup>3</sup>University of Vermont, Department of Psychiatry

<sup>4</sup>University of California, San Diego, Department of Pediatrics

<sup>5</sup>University of Southern California, Keck School of Medicine, Departments of Population and Public Health Sciences and Pediatrics

**Running title:** Brain change in youth with rapid weight gain

**Corresponding Author:**

Elizabeth Sowell, PhD

Director Developmental Cognitive Neuroimaging Laboratory

Professor of Pediatrics | Keck School of Medicine, University of Southern California

Division of Research on Children, Youth and Families | Department of Pediatrics

Children's Hospital Los Angeles

4650 Sunset Blvd., Mailstop #130 | Los Angeles, CA 90027

Ph: 323-361-7347 | Fax: 323.361.7836 | [esowell@chla.usc.edu](mailto:esowell@chla.usc.edu)

**SUPPLEMENTAL MATERIALS**

---

**Demographic assessments.** Caregiver report of the child's race/ethnicity, date of birth, and sex at birth were obtained at the baseline visit. The child's age at the time of each visit was recorded in months. Socioeconomic status was operationalized using the highest education of the household, of which there were 29 categories. Education was collapsed into five groups: <High school (HS), HS/Generalized Education Diploma (GED), Some college, Four-year degree (Bachelor's degree), Postgraduate education. Race and ethnicity had 22 options, which were collapsed into five groups: White, Black, Hispanic, Asian, and Mixed/Other.

**Behavioral Inhibition System / Behavioral Approach System (BIS/BAS):** Youth completed a modified and original BIS/BAS questionnaire<sup>1</sup>, which is commonly used to assess trait-based reward and inhibitory control. The questionnaire consists of 24 questions that are summarized into three BAS subscales and one BIS scale. The behavioral approach system (BAS) assesses goal-directed behaviors with subscales for reward responsiveness, fun seeking, and drive. The behavioral inhibition system (BIS) assesses avoidance-type behaviors and only has one subscale.

Questions for each subscale are scored on a 4-point scale from 1 (very true) to 4 (very false). Answers on the modified and original questionnaires were highly correlated ( $r=0.9$ ), so only the modified BIS/BAS was used in the analysis. Descriptions of each measure are presented in the **Supplemental Materials Table S3**.

**Urgency, Premeditation, Perseverance, Sensation Seeking, and Positive Urgency (UPPS-P):** The UPPS-P is a 59-item questionnaire that was answered by youth. The five subscales identify traits as outlined in the scale title. Questions for each subscale are scored on a 4-point scale from 1 (agree strongly) to 4 (disagree strongly). Descriptions of each measure are presented in the **Supplemental Materials Table S3**.

### **Elastic net regression:**

Initially, the entire dataset was randomly split into an 80% training dataset for model construction and a 20% testing set to assess model generalizability. Within the training dataset, separate models were trained and evaluated with 5-fold cross-validation (CV), stratified to preserve the ratio of  $WS_{HW}$  to  $WG$  participants within each fold. A measure of generalizability was assessed by applying the highest performing of the five models, as estimated by performance on their respective validation folds, to the previously unseen testing set. We report performance using the binary classification metric area under the curve (AUC), where  $AUC_{train}$  refers to AUC on the model's associated validation fold in the training set and  $AUC_{test}$  to AUC as calculated from the testing set. The implementation of the logistic elastic-net regression model included a further nested hyper-parameter search across 60 random combinations of values for both strength of regularization as well as ratio between L1 and L2 regularization. All machine learning models, training, and evaluation were conducted in Python through the Brain Predictability Toolbox package<sup>2</sup>. Brain features made available to the elastic-net model consisted of cortical Destrieux ( $n=148$ ) and subcortical ROIs ( $n=14$ ) for cortical thickness, surface area, subcortical volume, DTI FA, and DTI MD estimates ( $n_{total}=648$ ), as well as intracranial volume and motion estimates for the DTI scan. A set of nonbrain features were also made available as input features, which consisted of sex, age, puberty, highest household education (a proxy for socioeconomic status), race/ethnicity, intracranial volume, motion estimates for the DTI scan, and scanner ID. As a quality control step, the top and bottom 1% of the data for each ROI were winsorized (i.e., values <1% and >99% percentiles, respectively, were set to a truncated value) and then further normalized (each feature scaled to mean=0 and standard deviation=1 within that training sample). Both procedures were performed in a properly nested manner, where estimates of both 1<sup>st</sup> and 99<sup>th</sup> quantiles as well as other sample dependent measures were estimated only within training data folds. These analyses were conducted on 747/748 youth because one subject was missing fractional anisotropy estimates for two ROIs. Although the ABCD Study<sup>®</sup> often enrolled siblings, in this subset of the data, 98% ( $n=731$ ) of youth were singletons. However, after outlier exclusion, the test set had only 1 sibling pair within the  $WS_{HW}$  group, and, thus, independence issues in the test set were not of concern.

**Weight gain model confirmation:** Previously, one-year weight gain was found to not be confounded by BMI at baseline<sup>3</sup>. Again, to make sure weight status was not confounding results, we removed  $WG$  youth who were classified as having overweight or obesity at baseline and

reran the elastic-net regression. To account for a decrease in sample size, we increased the number of folds 10, otherwise, the parameters remained the same.

**Matched sample confirmation mixed effects analysis:** Our sample differed on several key demographics and the elastic-net regression identified age, puberty, and highest caregiver education as non-brain predictors of youth with WG, we chose to match on these key demographics. A 1-to-1 matching using the nearest neighbor method was performed in Python using `pymatch` (<https://github.com/benmiroglio/pymatch>). This resulted in a sample of 198 WG youth and 221 WS youth. Mixed models were then run on this matched sample and controlled for the following covariates: BMI, sex, race/ethnicity, caregiver report of prenatal exposure to alcohol and tobacco. Effects modeled were group (e.g., WS vs. WG) and Group x Time (e.g., baseline, two-year follow-up). Random effects included scanner serial ID and subject. Categorical variables were dummy coded with the largest group as the reference. Dependent variables were either the brain regions of interest of the two-year prediction or subscales from the BIS/BAS and UPPS questionnaire. Models that included cortical data included intracranial volume as a covariate, whereas DTI models included DTI motion as a covariate.

**Correlations between behavioral measurements and the brain:** We ran mixed models to determine if subscales of the UPPS were correlated with brain structure. Covariates entered into the model were weight stable group (e.g., weight stable vs. weight gainer), sex, BMI, age, puberty, race/ethnicity, and caregiver report of highest education. Categorical variables consisted of sex, race/ethnicity, and caregiver report of highest education. Models were adjusted for random effects of scanner (i.e., site) and subject.

### Supplemental Results:

*UPPS correlation with the brain:* Lack of perseverance was related to 4 surface area regions and 1 cortical thickness region. Lack of planning was related to 2 surface area regions. Negative urgency was related to 1 surface area and 1 cortical thickness region. Positive urgency was related to 1 fractional anisotropy, 1 surface area and 1 cortical thickness region. Sensation seeking was related to 1 surface area region. **Table S13** lists the  $t$  and  $p$  values for each region.

*Matched sample:* When matching on age, puberty, and highest caregiver education, there was no longer a group effect of FA in the parieto-occipital sulcus right hemisphere. All other Group and Group x Time interactions remained unchanged (see **Table S10**). Similarly, the results of the BIS/BAS (see **Table S12**) and UPPS (see **Table S15**) remained unchanged, but no longer survived multiple comparisons correction, possibly due to a smaller sample size

**Table S1.** The number of subjects available based on each exclusion criterion applied.

|                                                                       | <b>n</b>                 |              |
|-----------------------------------------------------------------------|--------------------------|--------------|
| Y2 released data                                                      | 6571                     |              |
| Not underweight (i.e., BMI %ile >5)                                   | 5882                     |              |
| No medications known to affect food intake                            | 5882                     |              |
| No learning disabilities or psychiatric disorders                     | 5882                     |              |
| No eating disorders based on caregiver report on the KSADS            | 4941                     |              |
| Complete data for sex, age, puberty, race, education                  | 4709                     |              |
| No height measurement error (i.e., decrease in height between visits) | 4617                     |              |
| Met WS <sub>HW</sub> /WG criteria                                     | 1034                     |              |
|                                                                       | WS <sub>HW</sub> (n=709) | WG (n = 316) |
| Passed FreeSurfer QC                                                  | 587                      | 256          |
| Acceptable T <sub>1</sub>                                             | 584                      | 254          |
| Acceptable T <sub>2</sub>                                             | 544                      | 238          |
| Acceptable DTI                                                        | 529                      | 226          |
| No missing tabulated data                                             | 527                      | 221          |
| Final sample                                                          | 527                      | 221          |

*Note.* Y2 = year 2; BMI %ile = Body mass index percentile according to the CDC sex-age-height-weight-specific growth curves for youth; WS<sub>HW</sub> = Healthy weight, Weight Stable; WG = Weight Gain; QC = quality control; T<sub>1</sub> = T<sub>1</sub>-weighted image; T<sub>2</sub> = T<sub>2</sub>-weighted image; DTI = diffusion tensor imaging. KSADS = Kiddie schedule for affective disorders and schizophrenia for school-age youth.

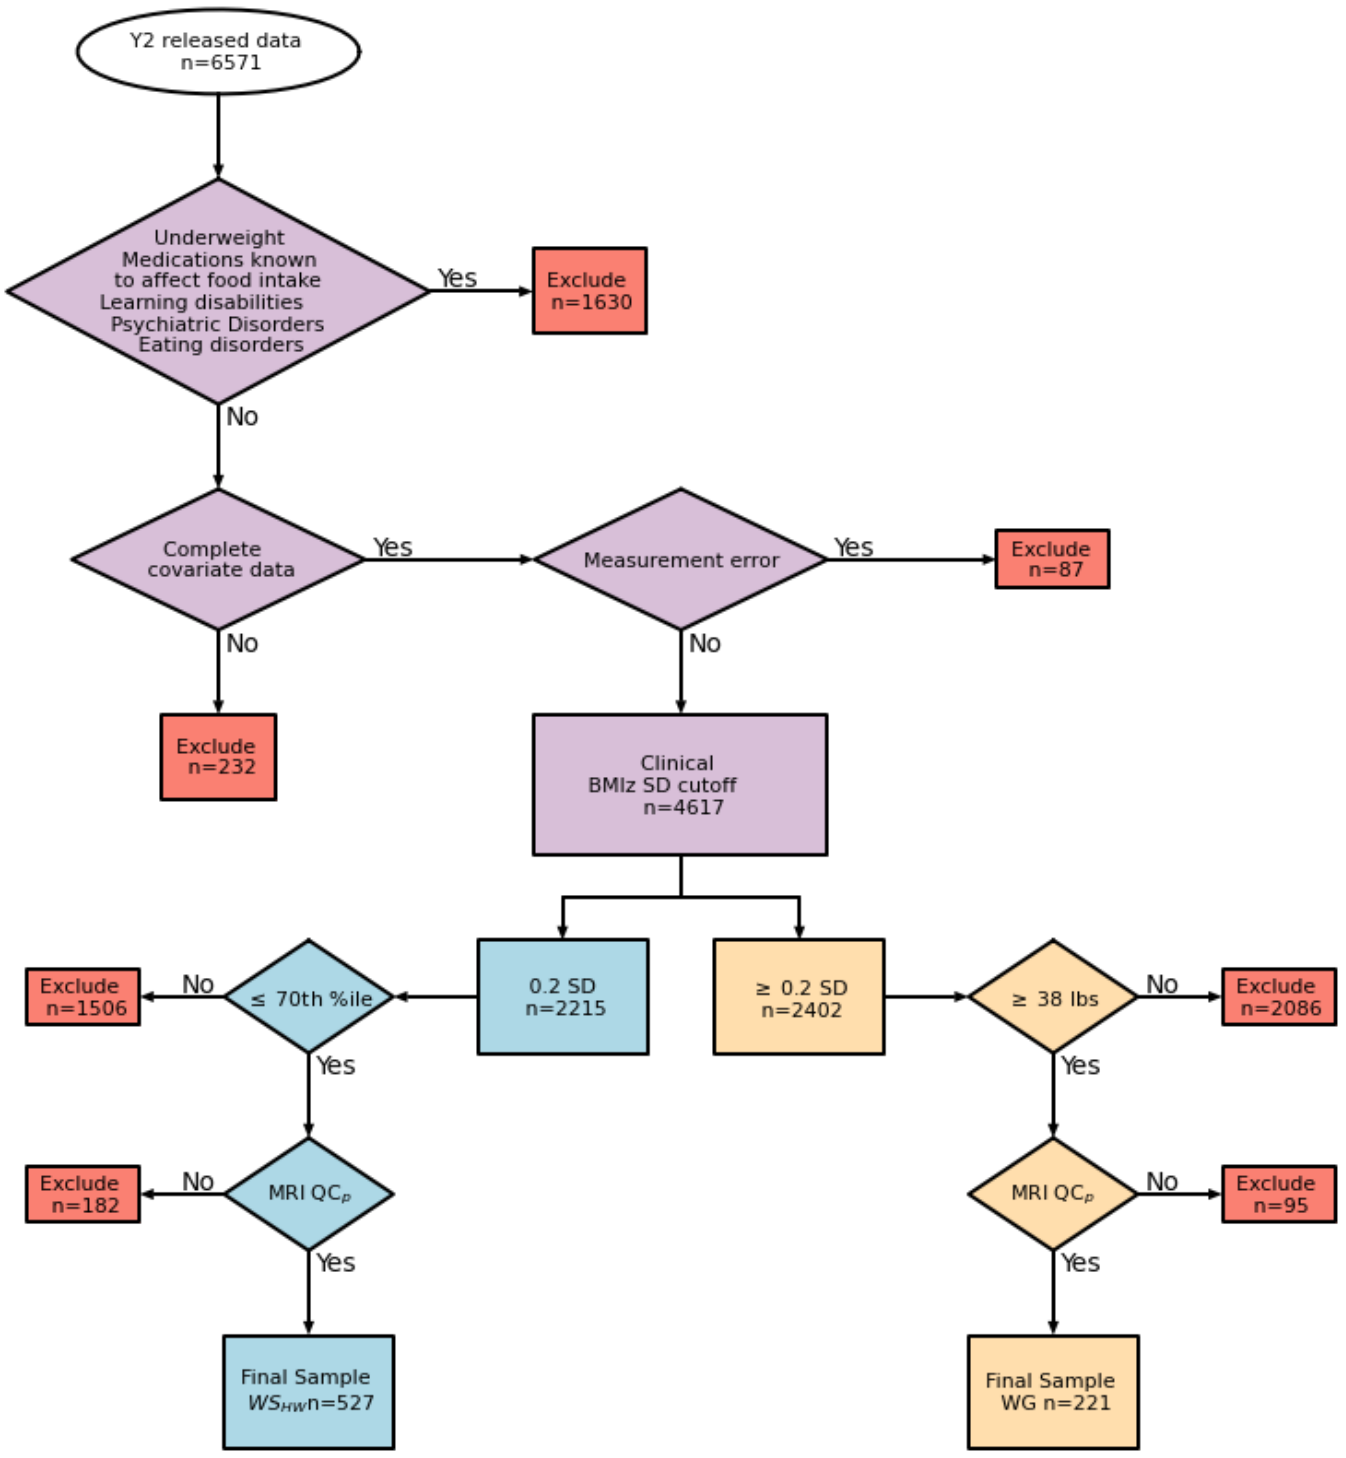

**Figure S1:** An overview of group selection. Y2= year 2; BMIz = BMI z-score; SD = standard deviation; %ile = BMI percentile; MRI = Magnetic Resonance Imaging; MRI QC<sub>p</sub> = passed MRI quality control parameters; WG = weight gain; WS<sub>HW</sub> = Healthy Weight, Weight Stable.

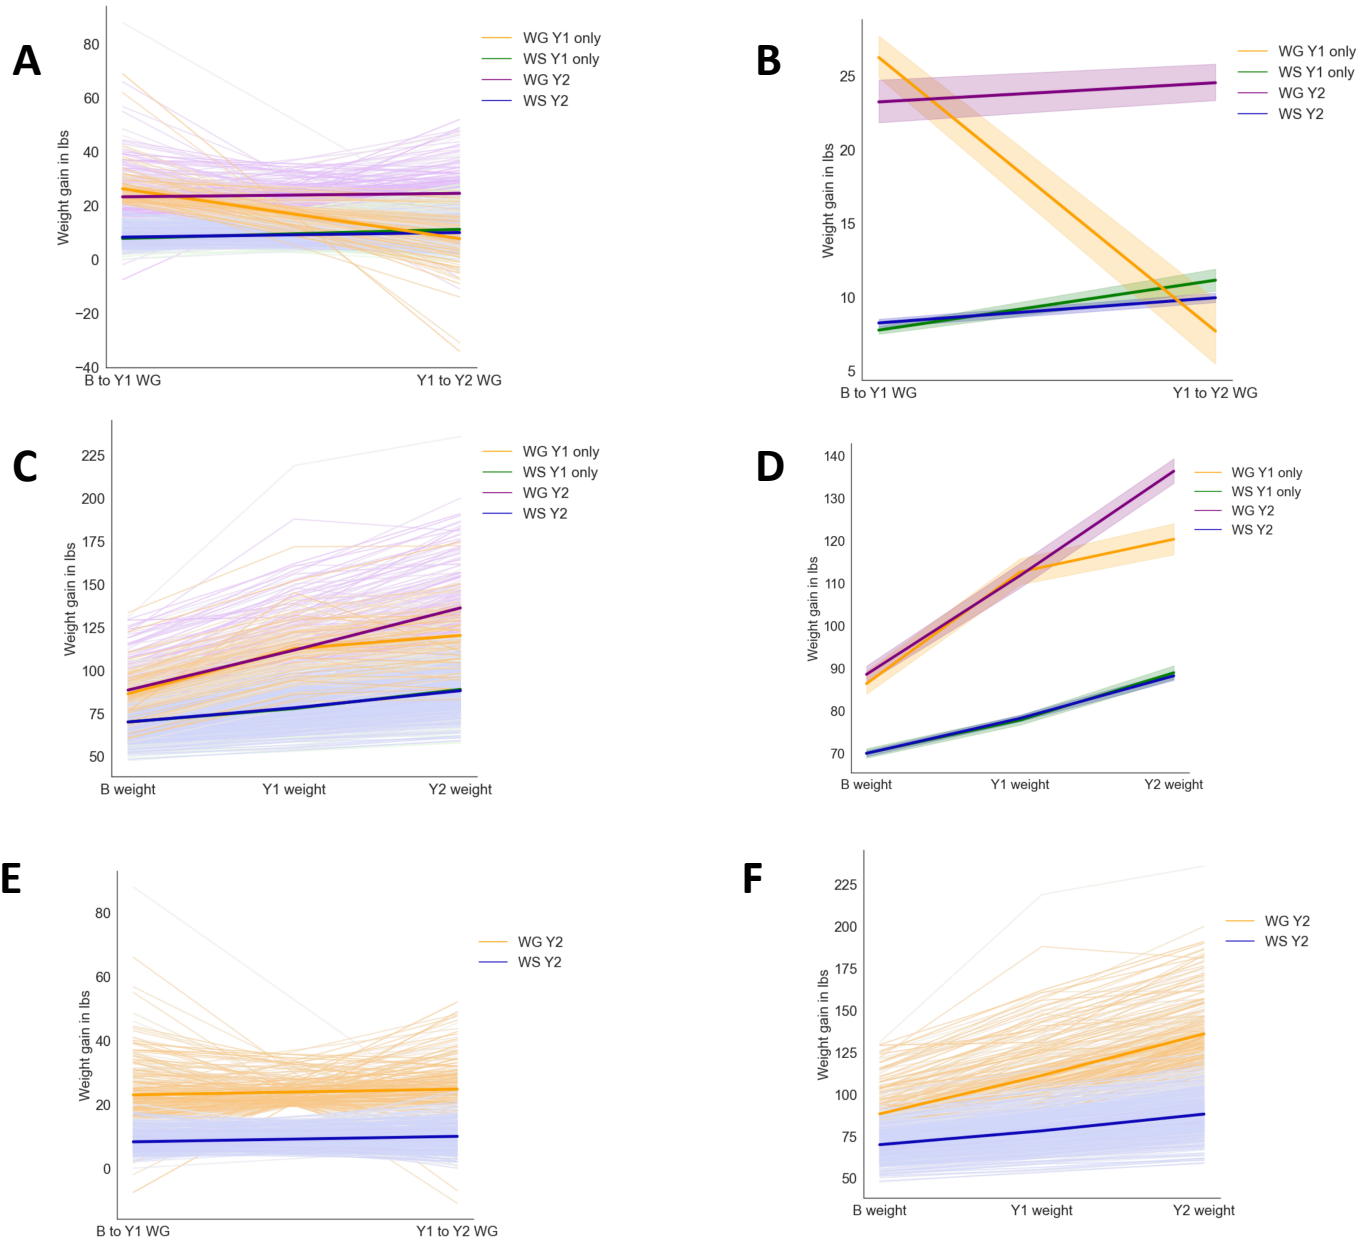

**Figure S2:** **A)** Spaghetti plots that depict weight gain in lbs from baseline (B) to one-year follow-up (Y1) and Y1 to the two-year follow-up (Y2) **B)** Group means for weight gain by year. **C)** Spaghetti plots of weight in pounds (lbs) at each time point collected. **D)** Group means for weight in pounds at each time point collected. **E)** Spaghetti plots for weight gain for youth included in the manuscript. **F)** Spaghetti plots for weight at each time point for the youth included in the manuscript. Bold lines indicate the mean for each group. WG Y1 only = youth who had extreme weight gain (WG) from baseline to one-year follow-up but not beyond this point. WS Y1 = youth who were weight stable from baseline to year 1 but not beyond. WG Y2 = youth with extreme weight gain from baseline to the two-year follow-up (included in the manuscript). WS Y2 = youth who were weight stable from baseline to the two-year follow-up (included in this manuscript).

**Table S2.** The number of youth in the health weight, Weight Stable ( $WS_{HS}$ ) and Weight Gain (WG) groups as defined in Adise et al., (2021)<sup>19</sup> that met criteria for WS and WG by the criteria outlined in this manuscript

|                                                        | $WS_{HW}$ at Y1 (n=637) | WG at Y1 (n=172) |
|--------------------------------------------------------|-------------------------|------------------|
| Had BMI data at Y2                                     | 617                     | 165              |
| No missing covariates at any time point                | 615                     | 163              |
| No eating disorders at Y1 or Y2                        | 536                     | 157              |
| No medications known to affect food intake at Y1 or Y2 | 536                     | 157              |
| Had MRI data at Y2                                     | 475                     | 140              |
| Passed FreeSurfer QC at Y2                             | 473                     | 138              |
| Passed $T_1$ MRI QC at Y2                              | 473                     | 137              |
| Passed $T_2$ MRI QC at Y2                              | 460                     | 127              |
| Passed DTI QC at Y2                                    | 456                     | 127              |
| Had BMI data at Y2                                     | 452                     | 126              |
| No BMI measurement error                               | 448                     | 126              |
| Met BMIz SD criteria from baseline to Y2               | 277                     | 113              |
| Met $WS_{HW}$ /WG criteria                             | 249                     | 58               |
| No missing tabulated MRI data                          | 249                     | 56               |

*Note.* Weight criteria for youth in the  $WS_{HW}$  group corresponded to a BMI percentile < 70% at all time points and a BMIz SD < 0.2 (clinical cut off). Weight criteria for youth in the WG group corresponded to weight gain > 38 lbs. across all time points in addition to a BMIz SD  $\geq$  0.2 (clinical cutoff). BMI = Body Mass Index. BMIz = BMI z-score;  $T_1$  =  $T_1$ -weighted image;  $T_2$  =  $T_2$ -weighted image; DTI = diffusion tensor imaging; Y1 = year 1; Y2 = year 2. MRI = Magnetic resonance imaging; QC = quality control; STD = standard deviation.



**Table S3.** Variable descriptions.

| Variable Groupings and Names in Data Release                                                         | Variable Descriptions                                                                                                                                 |
|------------------------------------------------------------------------------------------------------|-------------------------------------------------------------------------------------------------------------------------------------------------------|
| <b>Kiddy schedule for affective disorders and schizophrenia (KSADS)</b>                              |                                                                                                                                                       |
| Binge eating disorder                                                                                | Eating much more than normal in a short period of time, eating when not hungry.                                                                       |
| Anorexia nervosa                                                                                     | Restrictive eating, underweight (BMI<18.5 or 5 <sup>th</sup> %ile)                                                                                    |
| Bulimia nervosa                                                                                      | Binging (i.e., eating a lot) and purging (i.e., getting rid of) behavior                                                                              |
| Eating disorder not otherwise specified (EDOS) or Other Specified Feeding or Eating Disorder (OSFED) | Captures individuals who do not meet diagnostic criteria for anorexia nervosa or bulimia nervosa but still present with eating disorder-like symptoms |
| <b>Behavioral Inhibition System/ Behavioral Approach System</b>                                      |                                                                                                                                                       |
| Reward responsiveness                                                                                | Sensitivity to pleasant reinforcers in the environment                                                                                                |
| Fun seeking                                                                                          | Motivation to find novel rewards spontaneously                                                                                                        |
| Drive                                                                                                | Motivation to follow goals                                                                                                                            |
| Inhibition                                                                                           | Inhibitory control                                                                                                                                    |
| <b>Urgency, Premeditation, Perseverance, Sensation Seeking, and Positive Urgency (UPPS-P)</b>        |                                                                                                                                                       |
| Negative urgency                                                                                     | The tendency to act rashly (i.e., impulsively) under an intense negative mood                                                                         |
| Positive urgency                                                                                     | The tendency to act rashly (i.e., impulsively) while under an intense positive mood                                                                   |
| Sensation seeking                                                                                    | The tendency to seek out novel and thrilling experiences                                                                                              |
| Lack of planning/premeditation                                                                       | The tendency to not take into account the consequences of actions                                                                                     |
| Lack of perseverance                                                                                 | The tendency to quit a task when it becomes difficult, long, or boring.                                                                               |

**Table S4. Baseline brain regions predictive of one-year and two-year weight gain**

| <b>Brain regions at baseline (9/10-years-old) predictive of youth with 1-year weight gain at 10/11-years-old</b> | <b>Brain regions at baseline (9/10-years-old) predictive of youth with 2-year weight gain at 11/12-years-old</b> |
|------------------------------------------------------------------------------------------------------------------|------------------------------------------------------------------------------------------------------------------|
| <i>Cortical thickness</i>                                                                                        |                                                                                                                  |
| Frontomarginal gyrus RH**                                                                                        | Frontomarginal gyrus RH**                                                                                        |
|                                                                                                                  | Medial orbito-olfactory sulcus RH                                                                                |
|                                                                                                                  | Orbital gyrus LH                                                                                                 |
|                                                                                                                  | Parieto-occipital sulcus LH                                                                                      |
| Pericallosal sulcus LH                                                                                           |                                                                                                                  |
|                                                                                                                  | Posterior ramus of the lateral sulcus RH                                                                         |
| Posterior collateral transverse sulcus LH                                                                        |                                                                                                                  |
|                                                                                                                  | Posterior ventral cingulate gyrus RH                                                                             |
| Rectal gyrus LH                                                                                                  | Rectal gyrus LH                                                                                                  |
|                                                                                                                  | Rectal gyrus RH**                                                                                                |
| Sulcus intermedius primus (of Jensen) LH                                                                         |                                                                                                                  |
|                                                                                                                  | Sulcus intermedius primus (of Jensen) RH                                                                         |
|                                                                                                                  | Superior frontal sulcus LH                                                                                       |
| <i>Surface Area</i>                                                                                              |                                                                                                                  |
| Anterior occipital sulcus RH                                                                                     | Anterior occipital sulcus RH                                                                                     |
|                                                                                                                  | Frontomarginal gyrus RH                                                                                          |
| Inferior circular insula sulcus RH                                                                               | Inferior circular insula sulcus RH                                                                               |
|                                                                                                                  | Inferior frontal opercular gyrus RH                                                                              |
| Inferior parietal angular gyrus RH                                                                               |                                                                                                                  |
|                                                                                                                  | Inferior temporal gyrus LH                                                                                       |
|                                                                                                                  | Lateral orbital sulcus RH                                                                                        |
|                                                                                                                  | Middle temporal gyrus LH                                                                                         |
| Occipital temporal medial parahippocampal gyrus LH                                                               |                                                                                                                  |
|                                                                                                                  | Pericallosal sulcus RH                                                                                           |
|                                                                                                                  | Planum polare of the superior temporal gyrus LH                                                                  |
|                                                                                                                  | Postcentral sulcus LH                                                                                            |
|                                                                                                                  | Precuneus gyrus LH                                                                                               |
|                                                                                                                  | Superior frontal sulcus LH                                                                                       |
|                                                                                                                  | Superior occipital sulcus and transverse occipital sulcus LH                                                     |
| Superior temporal transverse gyrus LH                                                                            |                                                                                                                  |
| <i>Fractional anisotropy</i>                                                                                     |                                                                                                                  |
|                                                                                                                  | Accumbens area LH                                                                                                |

---

|                                                        |                                                        |
|--------------------------------------------------------|--------------------------------------------------------|
| Intraparietal and P transverse sulcus LH               | Anterior transverse temporal gyrus LH                  |
| Lateral orbital sulcus LH                              |                                                        |
| Paracentral gyrus and sulcus LH                        |                                                        |
|                                                        | Parieto-occipital sulcus RH**                          |
|                                                        | Posterior ventral cingulate gyrus RH**                 |
|                                                        | Subcallosal gyrus RH                                   |
|                                                        | Superior part of the precentral sulcus RH              |
| <i>Mean diffusivity</i>                                |                                                        |
|                                                        | Accumbens area RH**                                    |
| Anterior cingulate gyrus and sulcus RH                 |                                                        |
|                                                        | Anterior cingulate gyrus and sulcus LH                 |
|                                                        | Anterior occipital sulcus RH                           |
| Long insular gyrus and central sulcus of the insula LH |                                                        |
|                                                        | Long insular gyrus and central sulcus of the insula RH |
| Orbital medial olfactory gyrus RH                      |                                                        |
| Pallidum                                               |                                                        |
|                                                        | Rectal gyrus LH                                        |
|                                                        | Subcallosal gyrus LH                                   |
|                                                        | Superior circular insula sulcus LH                     |
| Superior parietal gyrus RH                             |                                                        |
|                                                        | Supramarginal gyrus LH                                 |
|                                                        | Temporal pole RH                                       |
| Intracranial volume                                    |                                                        |

---

*Note:* Salmon colored rows highlight the brain regions at baseline that were predictive of youth who had extreme weight gain by 10/11-years-old (i.e., one-year weight gain) and 11/12-years-old (i.e., two-year weight gain). \*\* = brain regions that showed change after two-years of weight gain.

**Table S5.** Prenatal characteristics for youth in the Healthy Weight, Weight Stable (WS<sub>HW</sub>) and Weight Gain (WG) groups and the rest of the sample with available data for year 2 (Other).

|                                                       | WS <sub>HW</sub> (n=527) | WG (n=225) | <i>p</i> <sub>group</sub> | Other        | <i>p</i> <sub>all</sub> |
|-------------------------------------------------------|--------------------------|------------|---------------------------|--------------|-------------------------|
| Birth Weight [ <i>M</i> ( <i>SD</i> )]                | 13.9 (4.5)               | 14.1 (4.4) | 0.6                       | 13.7 (4.4)   | 0.3                     |
| Born Premature [ <i>n</i> (%)]                        |                          |            |                           |              |                         |
| No                                                    | 415 (78.9)               | 176 (79.6) | 0.6                       | 3070 (79.3)  | 0.6                     |
| Yes                                                   | 106 (20.2)               | 41 (18.6)  |                           | 768 (19.9)   | 0.5                     |
| Refused to Answer                                     | 5 (1.0)                  | 4 (1.8)    |                           | 31 (0.8)     |                         |
| Weeks Premature [ <i>M</i> ( <i>SD</i> )]             | 4.6 (2.2)                | 5.3 (2.1)  | 0.7                       | 15.3 (101.0) |                         |
| Prenatal tobacco (short) exposure [ <i>n</i> (%)]     |                          |            |                           |              |                         |
| No                                                    | 467 (88.6)               | 173 (78.3) | 0.001                     | 3343 (86.4)  | 0.005                   |
| Yes                                                   | 52 (9.9)                 | 40 (18.1)  |                           | 452 (11.7)   |                         |
| Refused to Answer                                     | 8 (1.5)                  | 8 (3.6)    |                           | 73 (1.9)     |                         |
| Prenatal tobacco (continued) exposure [ <i>n</i> (%)] |                          |            |                           |              |                         |
| No                                                    | 498 (94.5)               | 198 (89.6) | 0.04                      | 2679 (69.3)  | 0.7                     |
| Yes                                                   | 22 (4.2)                 | 15 (6.8)   |                           | 973 (25.2)   |                         |
| Refused to Answer                                     | 7 (1.3)                  | 8 (3.6)    |                           | 216 (5.6)    |                         |
| Prenatal alcohol (short) exposure [ <i>n</i> (%)]     |                          |            |                           |              |                         |
| No                                                    | 356 (67.6)               | 152 (68.8) | 0.8                       | 3656 (94.5)  | 0.03                    |
| Yes                                                   | 133 (25.2)               | 56 (25.3)  |                           | 151 (3.9)    |                         |
| Refused to Answer                                     | 38 (7.2)                 | 13 (5.9)   |                           | 61 (1.6)     |                         |
| Prenatal alcohol (continued) exposure [ <i>n</i> (%)] |                          |            |                           |              |                         |
| No                                                    | 506 (96.0)               | 208 (94.1) | 0.03                      | 3710 (95.9)  | 0.09                    |
| Yes                                                   | 16 (3.0)                 | 5 (2.3)    |                           | 100 (2.6)    |                         |
| Refused to Answer                                     | 5 (0.9)                  | 8 (3.6)    |                           | 58 (1.5)     |                         |

*Note.* *p*<sub>group</sub> = significant group differences between WG and WS. *p*<sub>all</sub> = significant differences between WS<sub>HW</sub>, WG, and the rest of the sample. *M* = mean; *SD* = standard deviation; *n* = sample size; % = Percent. Short = substance use discontinued after pregnancy knowledge; continued = substance use continued throughout pregnancy. *p*-values represent significance testing for *t*-tests and chi-squared testing.

**Table S6.** Results from the mixed effects model examining how brain regions that were predictive of one-year weight gain<sup>3</sup> changed in response to two-years of weight gain.

| ROI                                                      |              | <i>F</i> | <i>p</i>                 |
|----------------------------------------------------------|--------------|----------|--------------------------|
| <i>Cortical Thickness</i>                                |              |          |                          |
| Anterior transverse collateral sulcus LH                 | Group        | 0.61     | 0.433                    |
|                                                          | Time         | 0.16     | 0.685                    |
|                                                          | Group x Time | 0.13     | 0.718                    |
| Frontomarginal gyrus and sulcus RH                       | Group        | 19.2     | < 0.001 <sup>a</sup> *** |
|                                                          | Time         | 2.18     | 0.140                    |
|                                                          | Group x Time | 9.86     | < 0.001 <sup>a</sup> *** |
| Pericallosal sulcus LH                                   | Group        | 0.52     | 0.467                    |
|                                                          | Time         | 0.08     | 0.774                    |
|                                                          | Group x Time | 0.97     | 0.322                    |
| Rectal gyrus LH                                          | Group        | 1.87     | 0.171                    |
|                                                          | Time         | 0.07     | 0.783                    |
|                                                          | Group x Time | 0.31     | 0.574                    |
| Sulcus intermedius primus (of Jensen) LH                 | Group        | 2.25     | 0.133                    |
|                                                          | Time         | 3.10     | 0.078                    |
|                                                          | Group x Time | 2.53     | 0.111                    |
| <i>Surface Area</i>                                      |              |          |                          |
| Angular gyrus RH                                         | Group        | 0.00     | 0.983                    |
|                                                          | Time         | 0.58     | 0.444                    |
|                                                          | Group x Time | 0.98     | 0.321                    |
| Anterior occipital sulcus RH                             | Group        | 0.15     | 0.698                    |
|                                                          | Time         | 1.53     | 0.215                    |
|                                                          | Group x Time | 0.92     | 0.335                    |
| Anterior transverse temporal gyrus LH                    | Group        | 0.00     | 0.969                    |
|                                                          | Time         | 0.12     | 0.722                    |
|                                                          | Group x Time | 4.02     | 0.045 *                  |
| Parahippocampal gyrus LH                                 | Group        | 2.74     | 0.098                    |
|                                                          | Time         | 0.01     | 0.911                    |
|                                                          | Group x Time | 0.78     | 0.374                    |
| Superior segment of the circular sulcus of the insula RH | Group        | 0.29     | 0.586                    |
|                                                          | Time         | 0.00     | 0.987                    |
|                                                          | Group x Time | 0.05     | 0.809                    |
| <i>Fractional Anisotropy</i>                             |              |          |                          |
| Intraparietal sulcus and transverse parietal sulci RH    | Group        | 1.36     | 0.243                    |
|                                                          | Time         | 2.34     | 0.125                    |
|                                                          | Group x Time | 2.30     | 0.129                    |
| Lateral orbital sulcus LH                                | Group        | 0.11     | 0.739                    |
|                                                          | Time         | 1.55     | 0.212                    |
|                                                          | Group x Time | 0.00     | 0.977                    |

|                                                        |              |      |          |
|--------------------------------------------------------|--------------|------|----------|
| Paracentral gyrus and sulcus LH                        | Group        | 0.58 | 0.445    |
|                                                        | Time         | 3.25 | 0.071    |
|                                                        | Group x Time | 0.19 | 0.662    |
| <i>Mean Diffusivity</i>                                |              |      |          |
| Anterior cingulate gyrus and sulcus RH                 | Group        | 0.28 | 0.593    |
|                                                        | Time         | 1.93 | 0.164    |
|                                                        | Group x Time | 0.05 | 0.818    |
| Long insular gyrus and central sulcus of the insula LH | Group        | 0.73 | 0.391    |
|                                                        | Time         | 4.23 | 0.039 *  |
|                                                        | Group x Time | 0.02 | 0.882    |
| Medial orbital sulcus RH                               | Group        | 0.99 | 0.317    |
|                                                        | Time         | 7.92 | 0.004 ** |
|                                                        | Group x Time | 0.09 | 0.755    |
| Pallidum RH                                            | Group        | 2.05 | 0.151    |
|                                                        | Time         | 0.41 | 0.521    |
|                                                        | Group x Time | 0.03 | 0.862    |
| Superior parietal sulcus RH                            | Group        | 0.06 | 0.804    |
|                                                        | Time         | 0.07 | 0.779    |
|                                                        | Group x Time | 0.62 | 0.428    |

*Note.* Results of the main effects and interactions from the mixed model testing for whether regions identified with predicting youth with rapid weight gain at the one-year time point (Adise et al., 2021)<sup>3</sup> exhibit structural changes in response to sustained, two-year, weight gain onset. Effects are independent of BMI, age, sex, baseline puberty, race/ethnicity, and highest household education and random effects (i.e., scanner and subject change). Reference variables for categorical variables: Healthy Weight, Weight Stable (WS<sub>HW</sub>), Male, White, and Bachelor's Degree. Time was not corrected for multiple comparisons because it was not an effect of interest but is reported for reader interpretation. G=gyrus; S=sulcus; RH=right hemisphere; LH=left hemisphere. ROI labels correspond to the Destrieux atlas labels. \*= $p < 0.05$ ; \*\*= $p < 0.01$ ; \*\*\*= $p < 0.001$ .  $p$  values are derived from the  $F$ -statistic. <sup>a</sup>=survived correction for multiple comparisons ( $n_{\text{tests}}=36$ ) for group and Group x Time interactions.

**Table S7.** The model estimates for the training and test dataset for the prediction analysis in which baseline features were used to predict group membership at two-years.

| Model            | Training (n = 605, n <sub>WG</sub> = 187) |      |         | Testing (n = 142, n <sub>WG</sub> = 33) |      |         | # of features |
|------------------|-------------------------------------------|------|---------|-----------------------------------------|------|---------|---------------|
|                  | AUC                                       | MCC  | Bal Acc | AUC                                     | MCC  | Bal Acc |               |
| Brain only       | 0.68                                      | 0.22 | 0.61    | 0.65                                    | 0.20 | 0.61    | 240           |
| Nonbrain only    | 0.74                                      | 0.32 | 0.67    | 0.77                                    | 0.45 | 0.76    | 37            |
| Brain + Nonbrain | 0.76                                      | 0.38 | 0.70    | 0.72                                    | 0.23 | 0.63    | 44            |

*Note.* The area under the curve (AUC), Matthews Correlation Coefficient (MCC), and balanced accuracy (Bal acc) as well as the number of features selected from the model are presented. Covariates were dummy coded for Race, sex, highest household education, and MRI scanner serial number. The brain features included region of interest (ROI) estimates for cortical thickness, surface area, diffusion tensor imaging (DTI) estimates of fractional anisotropy (FA) and mean diffusivity (MD), and subcortical volume regions. WG = weight gain.

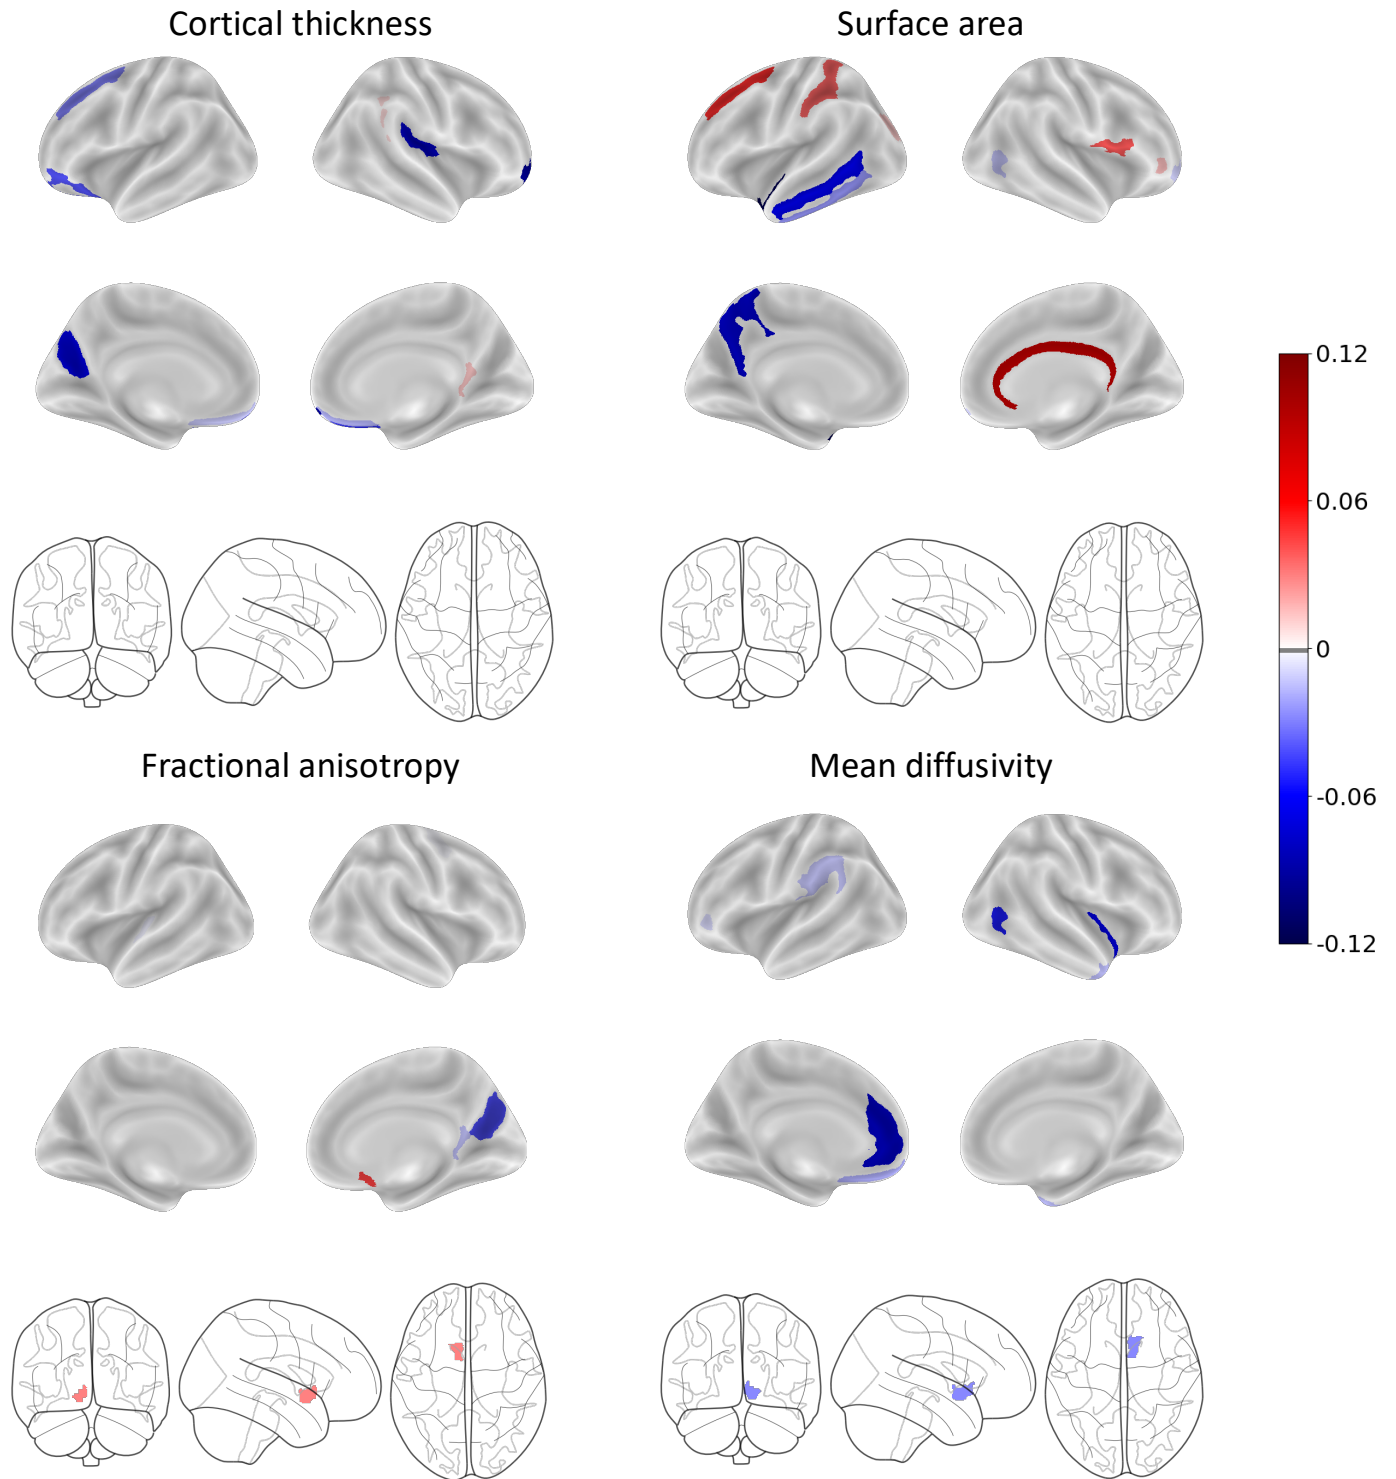

**Figure S3.** Visualization of the baseline brain features across each modality identified from the elastic net regression that predicted youth in the WG group after two-years of sustained, extreme weight gain. Colors correspond to the beta weights of the regression model.



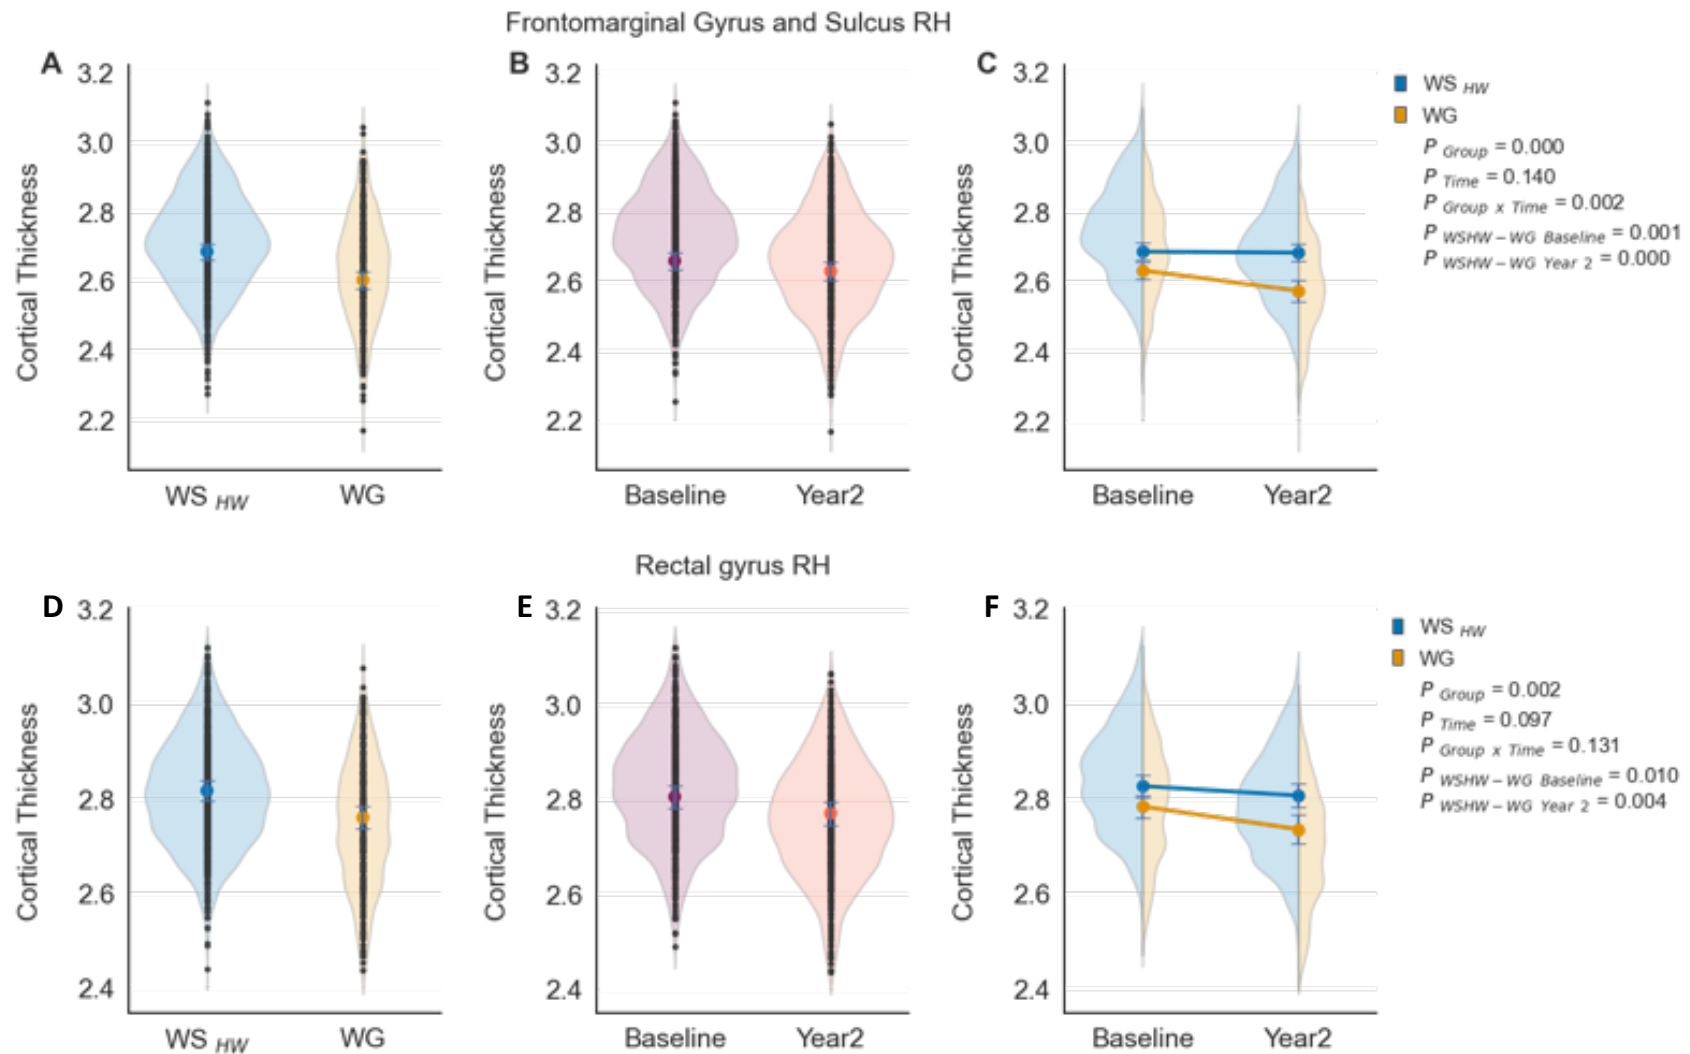

**Figure S4.** The distribution of estimates (i.e., violin plots and black dots) and means of the main effects and interactions adjusted for all covariates (e.g., age, sex, baseline puberty, BMI, race/ethnicity, highest household education, and caregiver report of prenatal exposure to alcohol and tobacco) and random effects (e.g., scanner and subject ID). **A** and **D**) Main effects of Group (Healthy Weight, Weight Stable [WS<sub>HW</sub>], Weight Gain [WG]) collapsed across time (baseline, year 2). **B** and **E**) Main effects of Time collapsed across group. **C** and **F**) Interactions between Group (WS<sub>HW</sub> vs. WG) by Time (baseline vs. year 2). RH = right hemisphere

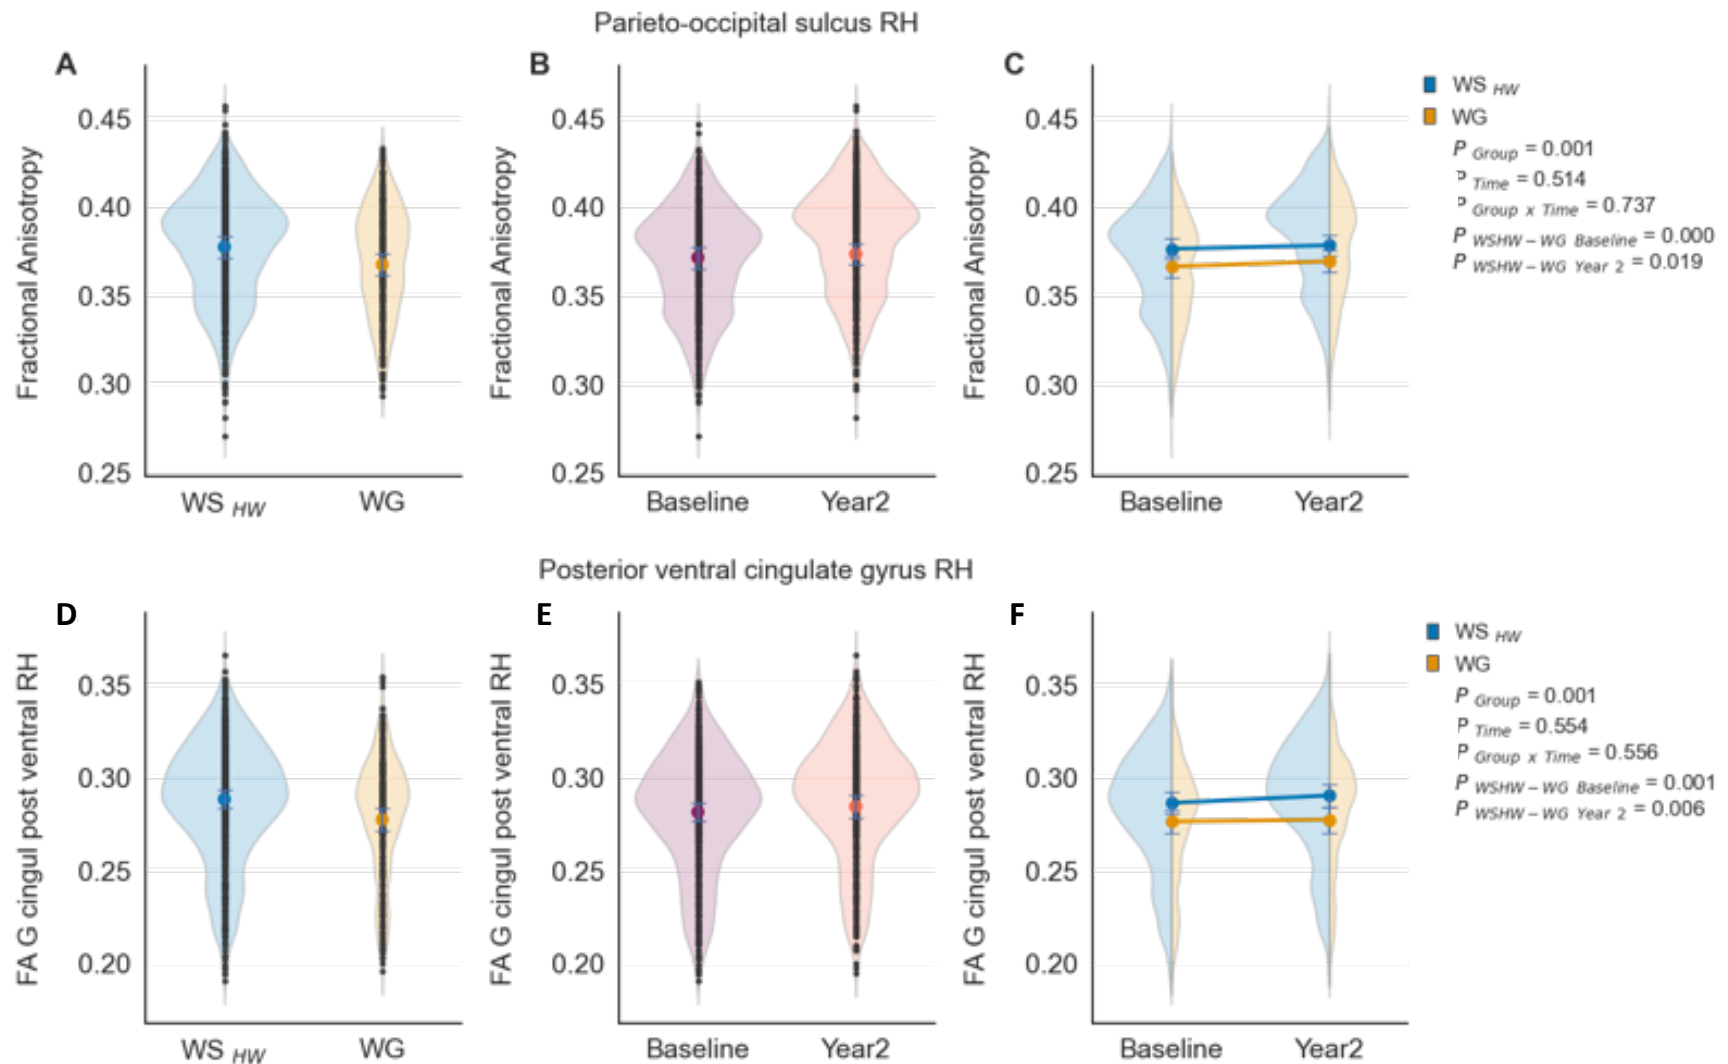

**Figure S5.** The distribution of estimates (i.e., violin plots and black dots) and means of the main effects and interactions adjusted for all covariates (e.g., age, sex, puberty, BMI, race/ethnicity, highest household education, and caregiver report of prenatal exposure to alcohol and tobacco) and random effects (e.g., scanner and subject ID). **A and D)** Main effects of Group (Healthy Weight, Weight Stable [WS<sub>HW</sub>], Weight Gain [WG]) collapsed across time (baseline, year 2). **B and E)** Main effects of Time collapsed across group. **C and F)** Interactions between Group (WS<sub>HW</sub> vs. WG) by Time (baseline vs. year 2). RH = right hemisphere

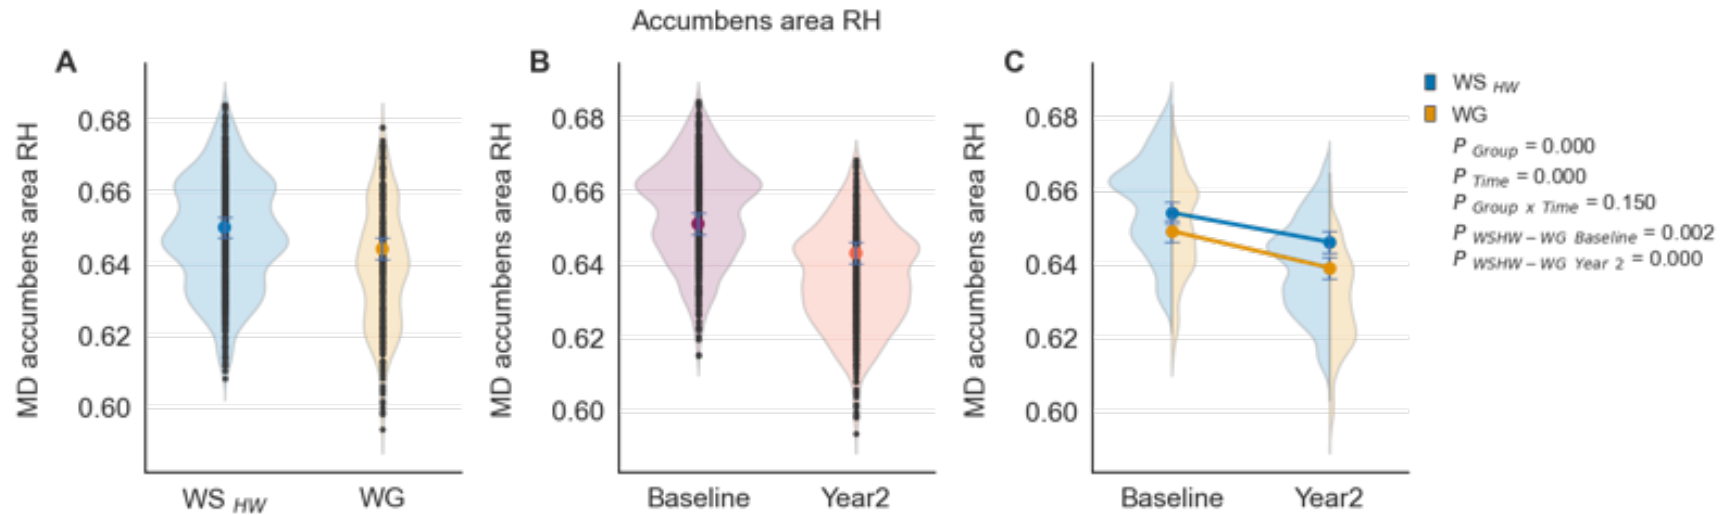

**Figure S6.** The distribution of estimates (i.e., violin plots and black dots) and means of the main effects and interactions adjusted for all covariates (e.g., age, sex, puberty, BMI, race/ethnicity, highest household education, and caregiver report of prenatal exposure to alcohol and tobacco) and random effects (e.g., scanner and subject ID). **A**) Main effects of Group (Weight Stable [WS<sub>HW</sub>], Weight Gain [WG]) collapsed across time (baseline, year 2). **B**) Main effects of Time collapsed across group. **C**) Interactions between Group (WS<sub>HW</sub> vs. WG) by Time (baseline vs. year 2). RH = right hemisphere

**Table S8.** Results of the main effects and interactions from the mixed model testing for whether regions identified at baseline as predictive of WG at the two-year period exhibited structural changes in response to WG onset.

| ROI                                      |              | <i>F</i> | <i>p</i>                |
|------------------------------------------|--------------|----------|-------------------------|
| <i>Cortical Thickness</i>                |              |          |                         |
| Frontomarginal gyrus RH                  | Group        | 19.2     | <0.001 <sup>a</sup> *** |
|                                          | Time         | 2.18     | 0.140                   |
|                                          | Group x Time | 9.86     | 0.001 <sup>a</sup> ***  |
| Posterior ventral cingulate gyrus RH     | Group        | 3.08     | 0.079                   |
|                                          | Time         | 1.17     | 0.277                   |
|                                          | Group x Time | 0.00     | 0.930                   |
| Orbital gyrus LH                         | Group        | 3.85     | 0.049 *                 |
|                                          | Time         | 2.04     | 0.152                   |
|                                          | Group x Time | 0.48     | 0.485                   |
| Rectal gyrus LH                          | Group        | 1.87     | 0.171                   |
|                                          | Time         | 0.07     | 0.783                   |
|                                          | Group x Time | 0.31     | 0.574                   |
| Rectal gyrus RH                          | Group        | 9.21     | 0.002 <sup>a</sup> **   |
|                                          | Time         | 2.75     | 0.097                   |
|                                          | Group x Time | 2.28     | 0.130                   |
| Posterior ramus of the lateral sulcus RH | Group        | 5.76     | 0.016 *                 |
|                                          | Time         | 0.01     | 0.898                   |
|                                          | Group x Time | 1.04     | 0.307                   |
| Superior frontal sulcus LH               | Group        | 1.54     | 0.214                   |
|                                          | Time         | 2.49     | 0.998                   |
|                                          | Group x Time | 0.08     | 0.770                   |
| Sulcus intermedius primus (of Jensen) RH | Group        | 0.11     | 0.731                   |
|                                          | Time         | 0.29     | 0.590                   |
|                                          | Group x Time | 0.24     | 0.620                   |
| Medial orbito-olfactory sulcus RH        | Group        | 7.43     | 0.006 **                |
|                                          | Time         | 0.17     | 0.676                   |
|                                          | Group x Time | 0.46     | 0.495                   |
| Parieto-occipital sulcus LH              | Group        | 6.05     | 0.014 *                 |
|                                          | Time         | 1.47     | 0.224                   |
|                                          | Group x Time | 0.10     | 0.743                   |
| <i>Surface Area</i>                      |              |          |                         |
| Frontomarginal gyrus RH                  | Group        | 0.04     | 0.829                   |
|                                          | Time         | 0.04     | 0.825                   |
|                                          | Group x Time | 0.09     | 0.757                   |
| Inferior frontal opercular gyrus RH      | Group        | 0.34     | 0.555                   |
|                                          | Time         | 2.49     | 0.114                   |
|                                          | Group x Time | 1.83     | 0.175                   |

|                                                              |              |      |            |
|--------------------------------------------------------------|--------------|------|------------|
| Precuneus gyrus LH                                           | Group        | 0.49 | 0.481      |
|                                                              | Time         | 0.45 | 0.499      |
|                                                              | Group x Time | 0.76 | 0.382      |
| Planum polare of the superior temporal gyrus LH              | Group        | 0.23 | 0.630      |
|                                                              | Time         | 0.24 | 0.617      |
|                                                              | Group x Time | 2.86 | 0.090      |
| Inferior temporal gyrus LH                                   | Group        | 5.05 | 0.024 *    |
|                                                              | Time         | 2.44 | 0.118      |
|                                                              | Group x Time | 0.87 | 0.349      |
| Middle temporal gyrus LH                                     | Group        | 0.22 | 0.636      |
|                                                              | Time         | 2.74 | 0.097      |
|                                                              | Group x Time | 1.33 | 0.247      |
| Inferior circular insula sulcus RH                           | Group        | 0.29 | 0.586      |
|                                                              | Time         | 0.00 | 0.987      |
|                                                              | Group x Time | 0.05 | 0.809      |
| Superior frontal sulcus LH                                   | Group        | 1.54 | 0.214      |
|                                                              | Time         | 0.37 | 0.538      |
|                                                              | Group x Time | 0.18 | 0.663      |
| Superior occipital sulcus and transverse occipital sulcus LH | Group        | 0.00 | 0.934      |
|                                                              | Time         | 0.02 | 0.868      |
|                                                              | Group x Time | 4.42 | 0.035 *    |
| Anterior occipital sulcus RH                                 | Group        | 0.15 | 0.698      |
|                                                              | Time         | 1.53 | 0.215      |
|                                                              | Group x Time | 0.92 | 0.335      |
| Lateral orbital sulcus RH                                    | Group        | 2.74 | 0.097      |
|                                                              | Time         | 2.11 | 0.145      |
|                                                              | Group x Time | 2.64 | 0.104      |
| Pericallosal sulcus RH                                       | Group        | 1.12 | 0.288      |
|                                                              | Time         | 0.19 | 0.655      |
|                                                              | Group x Time | 0.43 | 0.511      |
| Postcentral sulcus LH                                        | Group        | 2.38 | 0.123      |
|                                                              | Time         | 3.24 | 0.072      |
|                                                              | Group x Time | 0.00 | 0.968      |
| <i>Fractional Anisotropy</i><br>Accumbens area LH            | Group        | 1.96 | 0.161      |
|                                                              | Time         | 43.4 | <0.001 *** |
|                                                              | Group x Time | 1.75 | 0.186      |
| Posterior ventral cingulate gyrus RH                         | Group        | 10.7 | 0.001 a ** |
|                                                              | Time         | 0.35 | 0.553      |
|                                                              | Group x Time | 0.34 | 0.555      |
| Subcallosal gyrus RH                                         | Group        | 0.92 | 0.336      |
|                                                              | Time         | 17.1 | <0.001 *** |

|                                                        |              |      |                         |
|--------------------------------------------------------|--------------|------|-------------------------|
| Anterior transverse temporal gyrus LH                  | Group x Time | 2.45 | 0.117                   |
|                                                        | Group        | 3.42 | 0.064                   |
|                                                        | Time         | 0.36 | 0.546                   |
| Parieto-occipital sulcus RH                            | Group x Time | 0.66 | 0.415                   |
|                                                        | Group        | 10.2 | 0.001 <sup>a</sup> ***  |
|                                                        | Time         | 0.42 | 0.514                   |
| Superior part of the precentral sulcus RH              | Group x Time | 0.11 | 0.736                   |
|                                                        | Group        | 2.83 | 0.092                   |
|                                                        | Time         | 3.80 | 0.051                   |
|                                                        | Group x Time | 1.41 | 0.235                   |
| <i>Mean Diffusivity</i>                                |              |      |                         |
| Accumbens area RH                                      | Group        | 15.4 | <0.001 <sup>a</sup> *** |
|                                                        | Time         | 22.6 | <0.001 ***              |
|                                                        | Group x Time | 2.07 | 0.150                   |
| Anterior cingulate gyrus and sulcus LH                 | Group        | 1.13 | 0.286                   |
|                                                        | Time         | 0.39 | 0.530                   |
|                                                        | Group x Time | 0.00 | 0.923                   |
| Long insular gyrus and central sulcus of the insula RH | Group        | 1.45 | 0.227                   |
|                                                        | Time         | 7.58 | 0.005 **                |
|                                                        | Group x Time | 0.13 | 0.713                   |
| Supramarginal gyrus LH                                 | Group        | 0.42 | 0.515                   |
|                                                        | Time         | 0.14 | 0.706                   |
|                                                        | Group x Time | 0.01 | 0.890                   |
| Rectal gyrus LH                                        | Group        | 0.05 | 0.817                   |
|                                                        | Time         | 6.54 | 0.010 *                 |
|                                                        | Group x Time | 1.25 | 0.263                   |
| Subcallosal gyrus LH                                   | Group        | 4.18 | 0.041 *                 |
|                                                        | Time         | 15.8 | <0.001 ***              |
|                                                        | Group x Time | 0.21 | 0.642                   |
| Temporal pole RH                                       | Group        | 4.67 | 0.030 *                 |
|                                                        | Time         | 0.02 | 0.883                   |
|                                                        | Group x Time | 0.33 | 0.560                   |
| Superior circular insula sulcus LH                     | Group        | 1.69 | 0.192                   |
|                                                        | Time         | 0.24 | 0.618                   |
|                                                        | Group x Time | 0.49 | 0.482                   |
| Anterior occipital sulcus RH                           | Group        | 1.72 | 0.189                   |
|                                                        | Time         | 0.22 | 0.633                   |
|                                                        | Group x Time | 2.80 | 0.094                   |
| Lateral orbital sulcus LH                              | Group        | 0.43 | 0.507                   |
|                                                        | Time         | 0.03 | 0.849                   |

---

*Note.* Effects are independent of BMI, age, sex, baseline puberty, race/ethnicity, and highest parental education, caregiver report of prenatal exposure to alcohol and tobacco and random effects (e.g., scanner and subject). Reference variables for categorical variables: Healthy Weight, Weight Stable (WS<sub>HW</sub>), male, White, and Bachelor's Degree. Time was not corrected for multiple comparisons because it was not an effect of interest but is reported for reader interpretation. CI = confidence interval; G = gyrus; S = sulcus; RH = right hemisphere; LH = left hemisphere. ROI labels correspond to the Destrieux atlas labels. \* =  $p < 0.05$ ; \*\* =  $p < 0.01$ ; \*\*\* =  $p < 0.001$ .  $p$  values are derived from the  $F$ -statistic. <sup>a</sup> = survived correction for multiple comparisons ( $n_{\text{tests}} = 78$ ) for Group and Group x Time interactions.

**Table S9.** Post-hoc comparisons for the mixed effects models looking at group effects of brain structure change over time.

| Feature                              | <i>t</i> | <i>p</i> | WG          |                | W <sub>SHW</sub> |                |
|--------------------------------------|----------|----------|-------------|----------------|------------------|----------------|
|                                      |          |          | <i>M</i>    | 95% CI         | <i>M</i>         | 95% CI         |
| <i>Cortical thickness</i>            |          |          |             |                |                  |                |
| Frontomarginal gyrus RH              | 4.4      | <0.001   | 2.602±0.025 | [2.545, 2.66]  | 2.684±0.023      | [2.631, 2.736] |
| Rectal gyrus RH                      | 3.04     | 0.001    | 2.759±0.024 | [2.704, 2.814] | 2.816±0.022      | [2.766, 2.866] |
| <i>Fractional anisotropy</i>         |          |          |             |                |                  |                |
| Parieto-occipital sulcus RH          | 3.66     | <0.001   | 0.367±0.006 | [0.354, 0.38]  | 0.377±0.006      | [0.365, 0.39]  |
| Posterior ventral cingulate gyrus RH | 3.31     | 0.001    | 0.277±0.006 | [0.265, 0.29]  | 0.288±0.005      | [0.276, 0.3]   |
| <i>Mean diffusivity</i>              |          |          |             |                |                  |                |
| Accumbens area RH                    | 4.42     | <0.001   | 0.643±0.003 | [0.637, 0.65]  | 0.65±0.003       | [0.644, 0.657] |

**Note.** Results of the corrected main effects from the mixed model testing for whether regions identified at baseline as predictive of weight gain group membership at the two-year follow-up exhibited structural changes in response to weight gain onset. Effects are independent of BMI, age, sex, baseline puberty, race/ethnicity, highest household education, random effects (e.g., scanner and subject), and caregiver report of prenatal exposure to alcohol and tobacco. Reference variables for categorical variables: weight stable, male, White, and Bachelor's degree. CI=confidence interval; RH=right hemisphere; ROI labels correspond to the Destrieux atlas labels. \*= $p < 0.05$ ; \*\*= $p < 0.01$ ; \*\*\*= $p < 0.001$ . *p* values are derived from the *t*-statistic. <sup>a</sup>=survived correction for multiple comparisons ( $n_{\text{tests}}=78$ ) for Group and Group x Time interactions.



**Table S10.** Results of the main effects and interactions from the mixed model testing for whether regions identified at baseline as predictive of WG at the two-year period exhibited structural changes in response to WG onset for the matched sample.

| ROI                                             |              | <i>F</i> | <i>p</i>                 |
|-------------------------------------------------|--------------|----------|--------------------------|
| <i>Cortical Thickness</i>                       |              |          |                          |
| Frontomarginal gyrus RH                         | Group        | 17.33    | <0.001 <sup>a ***</sup>  |
|                                                 | Group x Time | 9.83     | < 0.001 <sup>a ***</sup> |
| Posterior ventral cingulate gyrus RH            | Group        | 3.40     | 0.07                     |
|                                                 | Group x Time | 0.14     | 0.70                     |
| Orbital gyrus LH                                | Group        | 3.56     | 0.06                     |
|                                                 | Group x Time | 0.34     | 0.56                     |
| Rectal gyrus LH                                 | Group        | 2.16     | 0.14                     |
|                                                 | Group x Time | 1.10     | 0.29                     |
| Rectal gyrus RH                                 | Group        | 11.07    | <0.001 <sup>a **</sup>   |
|                                                 | Group x Time | 2.91     | 0.08                     |
| Posterior ramus of the lateral sulcus RH        | Group        | 5.00     | 0.02 <sup>*</sup>        |
|                                                 | Group x Time | 0.32     | 0.60                     |
| Superior frontal sulcus LH                      | Group        | 2.35     | 0.12                     |
|                                                 | Group x Time | 1.22     | 0.27                     |
| Sulcus intermedius primus (of Jensen) RH        | Group        | 0.32     | 0.54                     |
|                                                 | Group x Time | 0.09     | 0.76                     |
| Medial orbito-olfactory sulcus RH               | Group        | 11.30    | <0.001 <sup>a **</sup>   |
|                                                 | Group x Time | 0.10     | 0.75                     |
| Parieto-occipital sulcus LH                     | Group        | 5.00     | 0.02 <sup>*</sup>        |
|                                                 | Group x Time | 0.61     | 0.43                     |
| <i>Surface Area</i>                             |              |          |                          |
| Frontomarginal gyrus RH                         | Group        | 0.00     | 0.97                     |
|                                                 | Group x Time | 0.78     | 0.38                     |
| Inferior frontal opercular gyrus RH             | Group        | 0.16     | 0.69                     |
|                                                 | Group x Time | 3.57     | 0.06                     |
| Precuneus gyrus LH                              | Group        | 0.59     | 0.44                     |
|                                                 | Group x Time | 0.38     | 0.54                     |
| Planum polare of the superior temporal gyrus LH | Group        | 0.03     | 0.85                     |
|                                                 | Group x Time | 2.58     | 0.11                     |
| Inferior temporal gyrus LH                      | Group        | 2.78     | 0.10                     |
|                                                 | Group x Time | 1.78     | 0.18                     |
| Middle temporal gyrus LH                        | Group        | 1.19     | 0.28                     |
|                                                 | Group x Time | 2.05     | 0.15                     |

|                                                              |              |       |                         |
|--------------------------------------------------------------|--------------|-------|-------------------------|
| Inferior circula insula sulcus RH                            | Group        | 0.03  | 0.87                    |
|                                                              | Group x Time | 0.26  | 0.61                    |
| Superior frontal sulcus LH                                   | Group        | 0.80  | 0.37                    |
|                                                              | Group x Time | 0.17  | 0.68                    |
| Superior occipital sulcus and transverse occipital sulcus LH | Group        | 0.12  | 0.73                    |
|                                                              | Group x Time | 1.95  | 0.16                    |
| Anterior occipital sulcus RH                                 | Group        | 2.71  | 0.10                    |
|                                                              | Group x Time | 1.61  | 0.20                    |
| Lateral orbital sulcus RH                                    | Group        | 1.62  | 0.20                    |
|                                                              | Group x Time | 1.00  | 0.32                    |
| Pericallosal sulcus RH                                       | Group        | 0.69  | 0.41                    |
|                                                              | Group x Time | 0.02  | 0.88                    |
| Postcentral sulcus LH                                        | Group        | 1.56  | 0.21                    |
|                                                              | Group x Time | 0.07  | 0.79                    |
| <i>Fractional Anisotropy</i>                                 |              |       |                         |
| Accumbens area LH                                            | Group        | 0.26  | 0.61                    |
|                                                              | Group x Time | 1.40  | 0.24                    |
| Posterior ventral cingulate gyrus RH                         | Group        | 8.39  | <0.001 <sup>a ***</sup> |
|                                                              | Group x Time | 0.00  | 0.98                    |
| Subcallosal gyrus RH                                         | Group        | 0.77  | 0.38                    |
|                                                              | Group x Time | 1.35  | 0.25                    |
| Anterior transverse temporal gyrus LH                        | Group        | 3.11  | 0.08                    |
|                                                              | Group x Time | 0.21  | 0.65                    |
| Parieto-occipital sulcus RH                                  | Group        | 3.05  | 0.08                    |
|                                                              | Group x Time | 0.01  | 0.94                    |
| Superior part of the precentral sulcus RH                    | Group        | 0.55  | 0.46                    |
|                                                              | Group x Time | 0.61  | 0.43                    |
| <i>Mean Diffusivity</i>                                      |              |       |                         |
| Accumbens area RH                                            | Group        | 16.19 | <0.001 <sup>a ***</sup> |
|                                                              | Group x Time | 1.16  | 0.28                    |
| Anterior cingulate gyrus and sulcus LH                       | Group        | 0.99  | 0.32                    |
|                                                              | Group x Time | 0.84  | 0.36                    |
| Long insular gyrus and central sulcus of the insula RH       | Group        | 2.93  | 0.09                    |
|                                                              | Group x Time | 0.29  | 0.59                    |
| Supramarginal gyrus LH                                       | Group        | 0.12  | 0.73                    |
|                                                              | Group x Time | 1.25  | 0.26                    |
| Rectal gyrus LH                                              |              |       |                         |

|                                    |              |      |       |
|------------------------------------|--------------|------|-------|
|                                    | Group        | 0.92 | 0.34  |
|                                    | Group x Time | 2.10 | 0.15  |
| Subcallosal gyrus LH               |              |      |       |
|                                    | Group        | 6.40 | 0.01* |
|                                    | Group x Time | 0.00 | 0.96  |
| Temporal pole RH                   |              |      |       |
|                                    | Group        | 4.95 | 0.03  |
|                                    | Group x Time | 0.02 | 0.89  |
| Superior circular insula sulcus LH |              |      |       |
|                                    | Group        | 1.56 | 0.21  |
|                                    | Group x Time | 0.97 | 0.33  |
| Anterior occipital sulcus RH       |              |      |       |
|                                    | Group        | 5.07 | 0.02* |
|                                    | Group x Time | 0.04 | 0.84  |
| Lateral orbital sulcus LH          |              |      |       |
|                                    | Group        | 0.51 | 0.47  |
|                                    | Group x Time | 0.52 | 0.47  |

*Note.* Sample was matched on age, puberty, and caregiver highest education. Effects are independent of BMI, sex, race/ethnicity, caregiver report of prenatal tobacco and alcohol exposure and random effects (e.g., scanner and subject). Reference variables for categorical variables: Healthy Weight, Weight Stable (WS<sub>HW</sub>), male, White, and Bachelor's Degree. Time was not corrected for multiple comparisons because it was not an effect of interest but is reported for reader interpretation. CI = confidence interval; G = gyrus; S = sulcus; RH = right hemisphere; LH = left hemisphere. ROI labels correspond to the Destrieux atlas labels. \* =  $p < 0.05$ ; \*\* =  $p < 0.01$ ; \*\*\* =  $p < 0.001$ .  $p$  values are derived from the  $F$ -statistic. <sup>a</sup> = survived correction for multiple comparisons.

**Table S11.** Results for the linear random mixed effects models for each subscale of the BIS/BAS questionnaire.

| Measure        |              | <i>F</i> | <i>p</i>    |
|----------------|--------------|----------|-------------|
| <i>BIS/BAS</i> |              |          |             |
| drive          | Group        | 0.24     | 0.617       |
|                | Time         | 1.60     | 0.204       |
|                | Group x Time | 0.48     | 0.488       |
| reward         | Group        | 0.00     | 0.982       |
|                | Time         | 1.94     | 0.163       |
|                | Group x Time | 0.08     | 0.771       |
| inhibition     | Group        | 2.08     | 0.148       |
|                | Time         | 17.2     | < 0.001 *** |
|                | Group x Time | 3.14     | 0.076       |
| fun seeking    | Group        | 0.65     | 0.416       |
|                | Time         | 5.71     | 0.016 *     |
|                | Group x Time | 1.06     | 0.303       |

*Note.* Results for the linear random mixed effects models for each subscale of the BIS/BAS questionnaire. Group = Weight Stable (WS<sub>HW</sub>) versus Weight Gain (WG). Time = Baseline vs. Year 2. Covariates entered into the model were age, sex, BMI, baseline puberty, race/ethnicity, caregiver report of highest education, and caregiver report of prenatal tobacco and alcohol exposure. Categorical variables consisted of sex, race/ethnicity, caregiver highest education, and caregiver report of prenatal tobacco and alcohol exposure. Models were adjusted for random effects of scanner (i.e., site) and subject. <sup>a</sup>= survived correction for multiple comparisons ( $n_{\text{tests}} = 8$ ) for group and Group x Time interactions.

**Table S12.** Results for the linear random mixed effects models for each subscale of the BIS/BAS questionnaire for the matched sample.

| Measure        |              | <i>F</i> | <i>p</i> |
|----------------|--------------|----------|----------|
| <i>BIS/BAS</i> |              |          |          |
| drive          | Group        | 0.99     | 0.312    |
|                | Group x Time | 0.32     | 0.572    |
| reward         | Group        | 0.04     | 0.838    |
|                | Group x Time | 0.31     | 0.580    |
| inhibition     | Group        | 0.32     | 0.569    |
|                | Group x Time | 4.56     | 0.033    |
| fun seeking    | Group        | 0.59     | 0.721    |
|                | Group x Time | 1.7      | 0.192    |

*Note.* Group = Weight Stable (WS<sub>HW</sub>) versus Weight Gain (WG). Time = Baseline vs. Year 2. Covariates entered into the model were sex, BMI, race/ethnicity, and caregiver report of prenatal exposure to tobacco and alcohol. Categorical variables consisted of sex, race/ethnicity, and caregiver report of prenatal exposure to tobacco and alcohol. Models were adjusted for random effects of scanner (i.e., site) and subject. <sup>a</sup> = survived correction for multiple comparisons ( $n_{\text{tests}} = 8$ ) for group and Group x Time interactions.

**Table S13. Main effects for each subscale of the UPPS on brain region by modality.**

| UPPS subscale               | Brain region                 | T-stat | P-val | Sig |
|-----------------------------|------------------------------|--------|-------|-----|
| <i>Lack of perseverance</i> | <i>Fractional anisotropy</i> |        |       |     |
|                             | Accumbens area lh            | -1.804 | 0.072 | .   |
|                             | G cingul post ventral rh     | 0.938  | 0.349 |     |
|                             | G subcallosal rh             | 0.139  | 0.889 |     |
|                             | G temp sup g t transv lh     | 0.113  | 0.91  |     |
|                             | S parieto occipital rh       | -1.242 | 0.214 |     |
|                             | S precentral sup part rh     | -0.882 | 0.378 |     |
|                             | <i>Mean diffusivity</i>      |        |       |     |
|                             | Accumbens area rh            | 0.472  | 0.637 |     |
|                             | G and S cingul ant lh        | -0.063 | 0.95  |     |
|                             | G ins lg and S cent ins rh   | -1.505 | 0.133 |     |
|                             | G pariet inf supramar lh     | -0.751 | 0.453 |     |
|                             | G rectus lh                  | 1.117  | 0.264 |     |
|                             | G subcallosal lh             | -0.872 | 0.384 |     |
|                             | Pole temporal rh             | 0.41   | 0.682 |     |
|                             | S circular insula sup lh     | -1.147 | 0.252 |     |
|                             | S occipital ant rh           | 0.416  | 0.678 |     |
|                             | S orbital lateral lh         | -0.701 | 0.483 |     |
|                             | <i>Surface area</i>          |        |       |     |
|                             | G and S frontomargin rh      | 0.042  | 0.967 |     |
|                             | G front inf opercular rh     | -0.83  | 0.407 |     |
|                             | G precuneus lh               | -1.75  | 0.08  | .   |
|                             | G temp sup plan polar lh     | -1.986 | 0.047 | *   |
|                             | G temporal inf lh            | -2.069 | 0.039 | *   |
|                             | G temporal middle lh         | 0.11   | 0.912 |     |
|                             | S circular insula inf rh     | -1.994 | 0.046 | *   |
|                             | S front sup lh               | -1.016 | 0.31  |     |
|                             | S oc sup and transversal lh  | 0.693  | 0.489 |     |
|                             | S occipital ant rh           | -1.421 | 0.156 |     |
|                             | S orbital lateral rh         | 0.056  | 0.955 |     |
|                             | S pericallosal rh            | 0.864  | 0.388 |     |
|                             | S postcentral lh             | -2.401 | 0.017 | *   |
|                             | <i>Cortical thickness</i>    |        |       |     |
|                             | G and S frontomargin rh      | 0.239  | 0.811 |     |
|                             | G cingul post ventral rh     | -1.611 | 0.107 |     |
|                             | G orbital lh                 | 0.091  | 0.928 |     |
|                             | G rectus lh                  | 1.326  | 0.185 |     |
|                             | G rectus rh                  | 2.046  | 0.041 | *   |
|                             | Lat fis post rh              | -0.222 | 0.824 |     |
|                             | S front sup lh               | -0.19  | 0.849 |     |
|                             | S interm prim jensen rh      | -1.52  | 0.129 |     |
|                             | S orbital med olfact rh      | 0.515  | 0.607 |     |
| S parieto occipital lh      | 1.662                        | 0.097  | .     |     |
| <i>Lack of planning</i>     | <i>Fractional anisotropy</i> |        |       |     |
|                             | Accumbens area lh            | -0.327 | 0.744 |     |
|                             | G cingul post ventral rh     | 1.438  | 0.151 |     |
|                             | G subcallosal rh             | -0.274 | 0.784 |     |
|                             | G temp supG t transv lh      | -0.544 | 0.586 |     |
|                             | S parieto occipital rh       | -1.07  | 0.285 |     |
|                             | S precentral sup part rh     | -0.517 | 0.605 |     |
|                             | <i>Mean diffusivity</i>      |        |       |     |

|                  |                              |        |       |    |
|------------------|------------------------------|--------|-------|----|
|                  | Accumbens area rh            | 0.201  | 0.841 |    |
|                  | G and S cingul ant lh        | 1.076  | 0.282 |    |
|                  | G ins lg and S cent ins rh   | -0.934 | 0.35  |    |
|                  | G pariet inf supramar lh     | 0.446  | 0.656 |    |
|                  | G rectus lh                  | 0.605  | 0.546 |    |
|                  | G subcallosal lh             | -0.388 | 0.698 |    |
|                  | Pole temporal rh             | 1.478  | 0.14  |    |
|                  | S circular insula sup lh     | 0.119  | 0.905 |    |
|                  | S occipital ant rh           | 0.227  | 0.821 |    |
|                  | S orbital lateral lh         | 0.418  | 0.676 |    |
|                  | <i>Surface area</i>          |        |       |    |
|                  | G and S frontomargin rh      | -1.017 | 0.309 |    |
|                  | G front inf opercular rh     | 0.436  | 0.663 |    |
|                  | G precuneus lh               | -0.711 | 0.477 |    |
|                  | G temp sup plan polar lh     | -0.707 | 0.48  |    |
|                  | G temporal inf lh            | -0.872 | 0.384 |    |
|                  | G temporal middle lh         | 2.729  | 0.006 | ** |
|                  | S circular insula inf rh     | -1.165 | 0.244 |    |
|                  | S front sup lh               | -0.284 | 0.776 |    |
|                  | S oc sup and transversal lh  | 1.619  | 0.106 |    |
|                  | S occipital ant rh           | 0.85   | 0.395 |    |
|                  | S orbital lateral rh         | 0.822  | 0.411 |    |
|                  | S pericallosal rh            | 1.7    | 0.089 | .  |
|                  | S postcentral lh             | -3.078 | 0.002 | ** |
|                  | <i>Cortical thickness</i>    |        |       |    |
|                  | G and S frontomargin rh      | -0.822 | 0.411 |    |
|                  | G cingul post ventral rh     | -0.368 | 0.713 |    |
|                  | G orbital lh                 | -1.637 | 0.102 |    |
|                  | G rectus lh                  | -0.834 | 0.404 |    |
|                  | G rectus rh                  | 0.562  | 0.574 |    |
|                  | Lat fis post rh              | -0.158 | 0.875 |    |
|                  | S front sup lh               | -1.811 | 0.07  | .  |
|                  | S interm prim jensen rh      | -0.007 | 0.994 |    |
|                  | S orbital med olfact rh      | 1.565  | 0.118 |    |
|                  | S parieto occipital lh       | -1.19  | 0.234 |    |
| Negative urgency | <i>Fractional anisotropy</i> |        |       |    |
|                  | Accumbens area lh            | -0.978 | 0.328 |    |
|                  | G cingul post ventral rh     | -0.053 | 0.958 |    |
|                  | G subcallosal rh             | -1.399 | 0.162 |    |
|                  | G temp supG t transv lh      | -0.478 | 0.633 |    |
|                  | S parieto occipital rh       | 1.28   | 0.201 |    |
|                  | S precentral sup part rh     | -1.341 | 0.18  |    |
|                  | <i>Mean diffusivity</i>      |        |       |    |
|                  | Accumbens area rh            | -0.406 | 0.685 |    |
|                  | G and S cingul ant lh        | 0.793  | 0.428 |    |
|                  | G ins lg and S cent ins rh   | 0.03   | 0.976 |    |
|                  | G pariet inf supramar lh     | -0.66  | 0.509 |    |
|                  | G rectus lh                  | -0.599 | 0.55  |    |
|                  | G subcallosal lh             | -0.459 | 0.647 |    |
|                  | Pole temporal rh             | -0.98  | 0.327 |    |
|                  | S circular insula sup lh     | -0.925 | 0.355 |    |
|                  | S occipital ant rh           | 0.78   | 0.435 |    |
|                  | S orbital lateral lh         | -0.698 | 0.485 |    |
|                  | <i>Surface area</i>          |        |       |    |
|                  | G and S frontomargin rh      | 1.476  | 0.14  |    |

|                  |                              |        |       |     |
|------------------|------------------------------|--------|-------|-----|
|                  | G front inf opercular rh     | 0.296  | 0.768 |     |
|                  | G precuneus lh               | -0.554 | 0.58  |     |
|                  | G temp sup plan polar lh     | -1.311 | 0.19  |     |
|                  | G temporal inf lh            | 1.329  | 0.184 |     |
|                  | G temporal middle lh         | 0.19   | 0.85  |     |
|                  | S circular insula inf rh     | -3.757 | 0     | *** |
|                  | S front sup lh               | -0.093 | 0.926 |     |
|                  | S oc sup and transversal lh  | 0.004  | 0.996 |     |
|                  | S occipital ant rh           | 1.081  | 0.28  |     |
|                  | S orbital lateral rh         | -0.763 | 0.446 |     |
|                  | S pericallosal rh            | 0.906  | 0.365 |     |
|                  | S postcentral lh             | -1.769 | 0.077 | .   |
|                  | <i>Cortical thickness</i>    |        |       |     |
|                  | G and S frontomargin rh      | 1.714  | 0.087 | .   |
|                  | G cingul post ventral rh     | 0.389  | 0.697 |     |
|                  | G orbital lh                 | 1.356  | 0.175 |     |
|                  | G rectus lh                  | 0.173  | 0.863 |     |
|                  | G rectus rh                  | 1.453  | 0.146 |     |
|                  | Lat fis post rh              | 0.852  | 0.395 |     |
|                  | S front sup lh               | 0.994  | 0.32  |     |
|                  | S interm prim jensen rh      | -0.275 | 0.784 |     |
|                  | S orbital med olfact rh      | 2.162  | 0.031 | *   |
|                  | S parieto occipital lh       | 1.129  | 0.259 |     |
| Positive urgency |                              |        |       |     |
|                  | <i>Fractional anisotropy</i> |        |       |     |
|                  | Accumbens area lh            | -0.882 | 0.378 |     |
|                  | G cingul post ventral rh     | 0.093  | 0.926 |     |
|                  | G subcallosal rh             | -2.149 | 0.032 | *   |
|                  | G temp supG t transv lh      | -0.479 | 0.632 |     |
|                  | S parieto occipital rh       | 0.794  | 0.428 |     |
|                  | S precentral sup part rh     | -1.368 | 0.172 |     |
|                  | <i>Mean diffusivity</i>      |        |       |     |
|                  | Accumbens area rh            | 1.114  | 0.265 |     |
|                  | G and S cingul ant lh        | -0.162 | 0.871 |     |
|                  | G ins lg and S cent ins rh   | -1.13  | 0.258 |     |
|                  | G pariet inf supramar lh     | 0.111  | 0.912 |     |
|                  | G rectus lh                  | -0.736 | 0.462 |     |
|                  | G subcallosal lh             | -0.08  | 0.936 |     |
|                  | Pole temporal rh             | 0.698  | 0.485 |     |
|                  | S circular insula sup lh     | -1.172 | 0.241 |     |
|                  | S occipital ant rh           | -1.36  | 0.174 |     |
|                  | S orbital lateral lh         | -1.103 | 0.27  |     |
|                  | <i>Surface area</i>          |        |       |     |
|                  | G and S frontomargin rh      | 0.345  | 0.731 |     |
|                  | G front inf opercular rh     | 0.076  | 0.939 |     |
|                  | G precuneus lh               | -0.002 | 0.999 |     |
|                  | G temp sup plan polar lh     | -0.764 | 0.445 |     |
|                  | G temporal inf lh            | 1.165  | 0.244 |     |
|                  | G temporal middle lh         | -0.689 | 0.491 |     |
|                  | S circular insula inf rh     | -2.849 | 0.004 | **  |
|                  | S front sup lh               | -0.449 | 0.654 |     |
|                  | S oc sup and transversal lh  | 0.258  | 0.797 |     |
|                  | S occipital ant rh           | -0.082 | 0.934 |     |
|                  | S orbital lateral rh         | -0.89  | 0.373 |     |
|                  | S pericallosal rh            | -0.347 | 0.729 |     |
|                  | S postcentral lh             | -1.576 | 0.115 |     |



|                   |                              |                |
|-------------------|------------------------------|----------------|
|                   | <i>Cortical thickness</i>    |                |
|                   | G and S frontomargin rh      | 0.402 0.688    |
|                   | G cingul post ventral rh     | -0.513 0.608   |
|                   | G orbital lh                 | 0.943 0.346    |
|                   | G rectus lh                  | 0.867 0.386    |
|                   | G rectus rh                  | 1.356 0.175    |
|                   | Lat fis post rh              | -0.294 0.769   |
|                   | S front sup lh               | 0.479 0.632    |
|                   | S interm prim jensen rh      | 0.497 0.619    |
|                   | S orbital med olfact rh      | 2.022 0.043 *  |
|                   | S parieto occipital lh       | -1.953 0.051 . |
| Sensation seeking | <i>Fractional anisotropy</i> |                |
|                   | Accumbens area lh            | 0.476 0.634    |
|                   | G cingul post ventral rh     | -1.509 0.132   |
|                   | G subcallosal rh             | -1.528 0.127   |
|                   | G temp supG t transv lh      | -0.783 0.434   |
|                   | S parieto occipital rh       | 1.143 0.253    |
|                   | S precentral sup part rh     | -0.243 0.808   |
|                   | <i>Mean diffusivity</i>      |                |
|                   | Accumbens area rh            | -0.761 0.447   |
|                   | G and S cingul ant lh        | -0.099 0.921   |
|                   | G ins lg and S cent ins rh   | -1.267 0.205   |
|                   | G pariet inf supramar lh     | -0.26 0.795    |
|                   | G rectus lh                  | -1.208 0.227   |
|                   | G subcallosal lh             | -1.191 0.234   |
|                   | Pole temporal rh             | 0.987 0.324    |
|                   | S circular insula sup lh     | -0.63 0.529    |
|                   | S occipital ant rh           | 0.01 0.992     |
|                   | S orbital lateral lh         | -1.034 0.301   |
|                   | <i>Surface area</i>          |                |
|                   | G and S frontomargin rh      | 0.743 0.457    |
|                   | G front inf opercular rh     | 0.34 0.734     |
|                   | G precuneus lh               | -0.172 0.864   |
|                   | G temp sup plan polar lh     | -0.11 0.912    |
|                   | G temporal inf lh            | 0.564 0.573    |
|                   | G temporal middle lh         | -0.029 0.977   |
|                   | S circular insula inf rh     | -0.262 0.793   |
|                   | S front sup lh               | 2.12 0.034 *   |
|                   | S oc sup and transversal lh  | 0.051 0.959    |
|                   | S occipital ant rh           | 0.345 0.731    |
|                   | S orbital lateral rh         | 0.567 0.571    |
|                   | S pericallosal rh            | -1.437 0.151   |
|                   | S postcentral lh             | -0.958 0.338   |
|                   | <i>Cortical thickness</i>    |                |
|                   | G and S frontomargin rh      | 0.152 0.879    |
|                   | G cingul post ventral rh     | -0.489 0.625   |
|                   | G orbital lh                 | -0.013 0.99    |
|                   | G rectus lh                  | -1.194 0.233   |
|                   | G rectus rh                  | -0.803 0.422   |
|                   | Lat fis post rh              | -0.503 0.615   |
|                   | S front sup lh               | -0.326 0.745   |
|                   | S interm prim jensen rh      | 0.021 0.983    |
|                   | S orbital med olfact rh      | 0.316 0.752    |
|                   | S parieto occipital lh       | -0.625 0.532   |

*Note:* Covariates entered into the model were weight stable group (e.g., weight stable vs. weight gainer), sex, BMI, age, puberty, race/ethnicity, and caregiver report of highest education. Categorical variables consisted of sex, race/ethnicity, and caregiver report of highest education. Models were adjusted for random effects of scanner (i.e., site) and subject. Rh = right hemisphere. Lh = left hemisphere. G = gyrus. S = sulcus. Brain regions reflect the naming mechanism for the destrieux atlas.

**Table S14.** Results for the linear random mixed effects models for each subscale of the UPPS-P questionnaire.

| Measure              |              | <i>F</i> | <i>p</i>                 |
|----------------------|--------------|----------|--------------------------|
| <i>UPPS-P</i>        |              |          |                          |
| Negative urgency     | Group        | 0.11     | 0.739                    |
|                      | Time         | 17.2     | < 0.001 ***              |
|                      | Group x Time | 0.91     | 0.337                    |
| Lack of planning     | Group        | 3.87     | 0.049 *                  |
|                      | Time         | 0.97     | 0.323                    |
|                      | Group x Time | 1.54     | 0.214                    |
| Sensation seeking    | Group        | 0.21     | 0.646                    |
|                      | Time         | 1.47     | 0.224                    |
|                      | Group x Time | 0.28     | 0.590                    |
| Positive urgency     | Group        | 0.00     | 0.936                    |
|                      | Time         | 11.5     | < 0.001 ***              |
|                      | Group x Time | 10.9     | < 0.001 <sup>a</sup> *** |
| Lack of perseverance | Group        | 7.61     | 0.005 <sup>a</sup> **    |
|                      | Time         | 1.84     | 0.174                    |
|                      | Group x Time | 3.43     | 0.064                    |

*Note.* Results for the linear random mixed effects models for each subscale of the UPPS-P questionnaire. Group=Weight Stable (WS<sub>HW</sub>) vs. Weight Gain (WG). Time=Baseline vs. Year 2. Covariates entered into the model were age, sex, BMI, puberty, race/ethnicity, highest household education, and caregiver report of prenatal exposure to alcohol and tobacco. Categorical variables consisted of sex, race/ethnicity, highest household education, and caregiver report for prenatal alcohol and tobacco. Models were adjusted for random effects of scanner (i.e., site) and subject. <sup>a</sup>=survived correction for multiple comparisons ( $n_{\text{tests}}=10$ ) for group and Group x Time interactions.

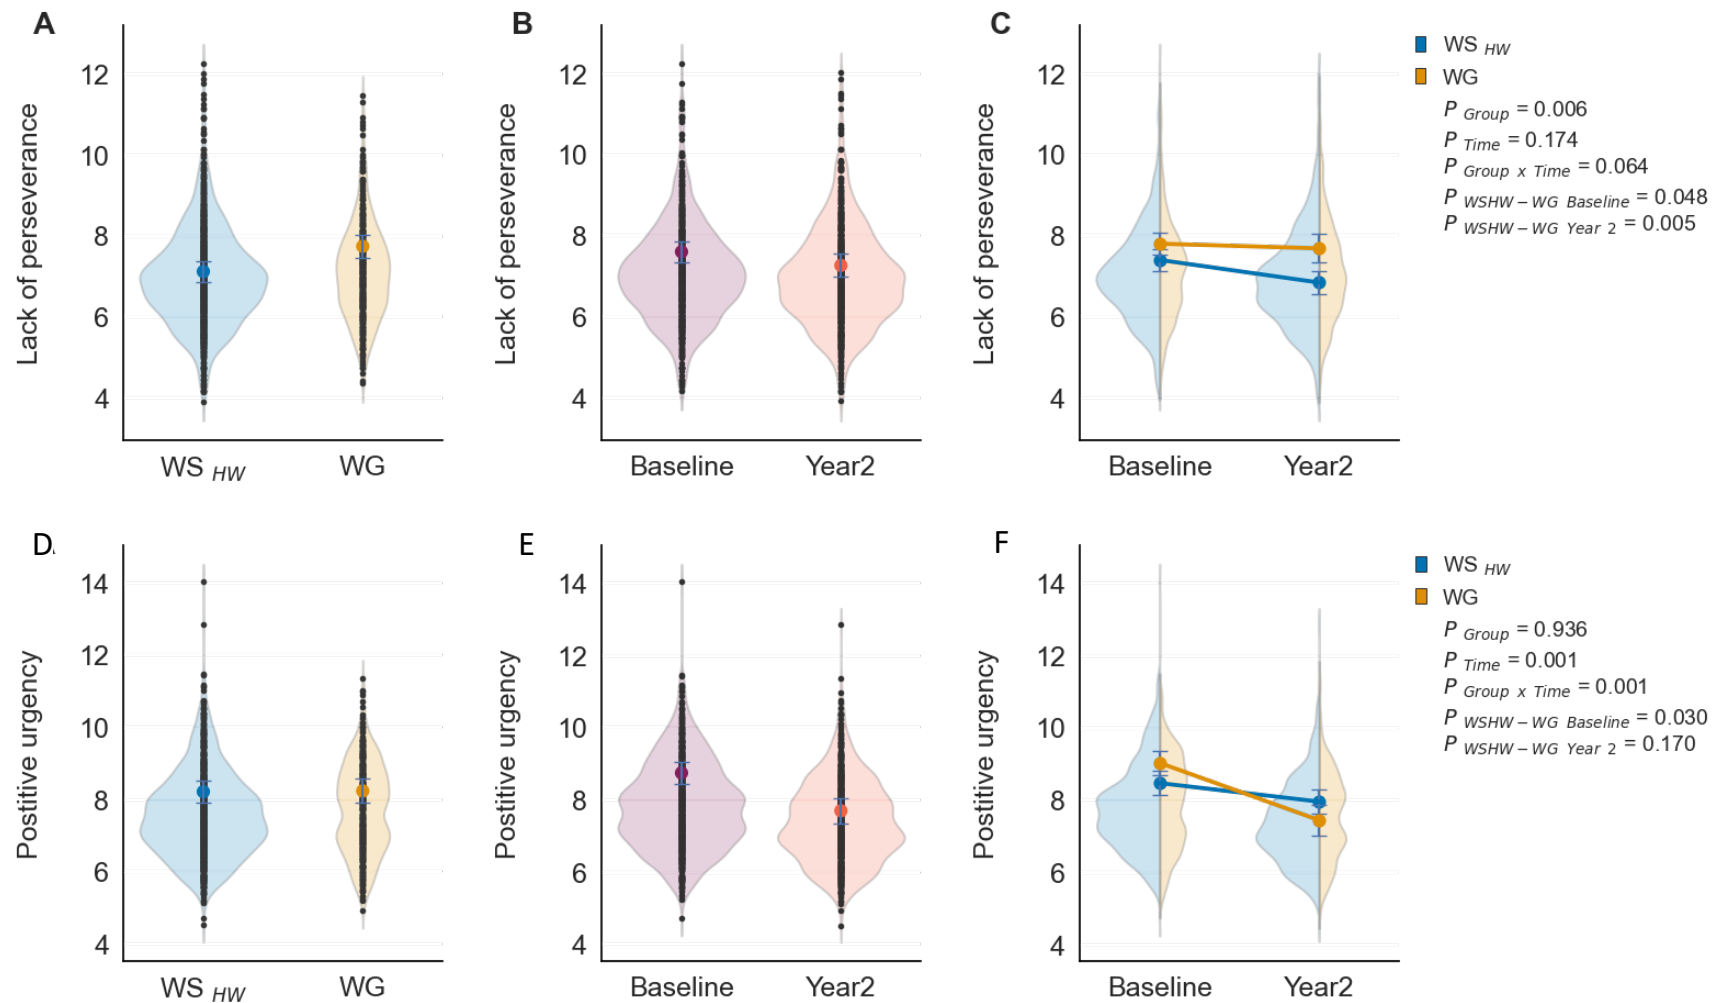

**Figure S7.** The distribution of estimates (i.e., violin plots) and means (i.e., circles) for the positive urgency subscale of the UPPS-P. Positive urgency is the tendency to be impulsive during positive affect states. **A)** Main effect of Group (i.e., Weight Stable [WS<sub>HW</sub>] vs. Weight Gain [WG]) collapsed across time (i.e., baseline vs. year 2); **B)** Main effect of time collapsed across Group; **C)** Interaction between Group x Time. Effects were independent of age, sex, BMI, puberty, race/ethnicity, highest household education, and caregiver report of prenatal exposure to alcohol and tobacco. For **A** and **B**, the circle and error bars depict that marginal means and standard errors for the WS<sub>HW</sub> and WG groups collapsed across time point (i.e., baseline to year 2). The black dots represent individual subject fit estimates. For **C**, the lines connecting the means indicate the change from baseline to year 2.

**Table S15.** Results for the linear random mixed effects models for each subscale of the UPPS questionnaire for the matched sample.

| Measure              |              | <i>F</i> | <i>p</i> |
|----------------------|--------------|----------|----------|
| <i>UPPS-P</i>        |              |          |          |
| Negative urgency     | Group        | 0.61     | 0.433    |
|                      | Group x Time | 1.01     | 0.314    |
| Lack of planning     | Group        | 2.35     | 0.125    |
|                      | Group x Time | 1.75     | 0.186    |
| Sensation seeking    | Group        | 0.03     | 0.847    |
|                      | Group x Time | 0.03     | 0.871    |
| Positive urgency     | Group        | 0.01     | 0.900    |
|                      | Group x Time | 7.82     | 0.005**  |
| Lack of perseverance | Group        | 4.41     | 0.036*   |
|                      | Group x Time | 0.96     | 0.326    |

*Note.* Results for the linear random mixed effects models for each subscale of the UPPS-P questionnaire for the matched sample. The elastic net regression identified puberty, age, and highest caregiver education as non-brain features that were predictive of weight gain. Therefore, the groups were matched on these variables at baseline and a linear mixed effects analyses was conducted to determine Group and Group x Time interactions. Group=Weight Stable (WS<sub>HW</sub>) vs. Weight Gain (WG). Time=Baseline vs. Year 2. Covariates entered into the model were sex, BMI, race/ethnicity, and caregiver report of prenatal exposure to alcohol and tobacco. Categorical variables consisted of sex, race/ethnicity, and caregiver report for prenatal alcohol and tobacco. Models were adjusted for random effects of scanner (i.e., site) and subject. <sup>a</sup>=survived correction for multiple comparisons ( $n_{\text{tests}}=10$ ) for group and Group x Time interactions.

## References:

1. Barch, D. M. *et al.* Demographic, physical and mental health assessments in the adolescent brain and cognitive development study: Rationale and description. *Developmental Cognitive Neuroscience* **32**, 55–66 (2018).
2. Hahn, S. *et al.* Brain Predictability toolbox: a Python library for neuroimaging-based machine learning. *Bioinformatics* **37**, 1637–1638 (2021).
3. Adise, S. *et al.* Multimodal brain predictors of current weight and weight gain in children enrolled in the ABCD study ®. *Developmental Cognitive Neuroscience* **49**, 100948 (2021).
